# Supplementary material for: Naphthalenediimide-carbonylpyridiniums: stable six electron acceptors for organic cathodes
Source: Royal Society of Chemistry journal article supplement (doi:10.1039/d3qm00501a), 2023-01-01
Supplement: d3qm00501a1.pdf [file d3qm00501a1.pdf]

*Electronic Supplementary Information*

# Naphthalenediimide-carbonylpyridiniums: Stable Six Electron Acceptors for Organic Cathodes

*Qiting Lin, Heyang Li, Ling Chen, Xiaoming He\**

\*To whom correspondence should be addressed

Key Laboratory of Applied Surface and Colloid Chemistry (Ministry of Education), School of Chemistry and Chemical Engineering, Shaanxi Normal University, Xi'an 710119, P.R. China

\*Corresponding Author Email: [xmhe@snnu.edu.cn](mailto:xmhe@snnu.edu.cn)

## EXPERIMENTAL SECTION

**Materials and Methods.** Polyvinylidene fluoride (PVDF) and 1-methyl-2-pyrrolidinone (NMP) were purchased from Shenzhen Kejing Zhida Technology Co., Ltd. LiClO<sub>4</sub>, tetraglyme (G4), CR2032 battery case, and separator (polypropylene, Celgard 2400) were purchased from DoDoChem. All other chemical reagents were purchased from commercial sources (Aldrich, Alfa Aesar, Strem and Adamas) and were, unless otherwise noted, used without further purification.

<sup>1</sup>H NMR and <sup>13</sup>C NMR spectra were recorded on 400 MHz and 600 MHz BRUKER spectrometers. Chemical shifts were referenced to residual non-deuterated solvent peaks. Mass spectrometry data were collected on a Bruker maxis UHR-TOF mass spectrometer in ESI positive mode. PXRD patterns were recorded on a Bruker D8 Advance instrument with Cu K $\alpha$  X-ray radiation ( $\lambda=1.5406$  Å). TGA was conducted under a nitrogen atmosphere on a TA Q600 instrument with a heating rate of 10 °C min. Ultraviolet–visible (UV-vis) absorption spectra were recorded on a Cary 3500 spectrometer. Scanning electron microscope (SEM) images were recorded using a Hitachi SU8220 system. Cyclic voltammetry (CV) was performed on a Shanghai Chenhua CHI760E instrument, with a polished glassy carbon electrode as the working electrode, a Pt-wire as counter electrode, and Ag/AgCl as a reference electrode, using ferrocene/ferrocenium (Fc/Fc<sup>+</sup>) as internal standard. CV experiments for small molecules were performed in DMF solution with tetrabutylammonium hexafluorophosphate (0.05 M) as supporting electrolyte. Theoretical calculations have been carried out at the B3LYP/6-31G(d,p) level by using the GAUSSIAN 09 suite of programs.

**Synthesis of 2,6-dibromonaphthalene-1,4,5,8-tetracarboxylicdianhydride (S0).** This was synthesized according to previously reported protocol.<sup>S1</sup> In 250 mL single-necked RB flask, 10.72 g (40 mmol, 1 eq) of naphthalene-1,4,5,8-tetracarboxylicdianhydride was stirred in concentrated sulfuric acid (100 mL) at room temperature, the mixture was stirred at room temperature for 5 min to obtain a solution. Then, 17.16 g (60 mmol, 1.5 eq) of 1,3-dibromo-5,5-dimethylhydantoin (DBH) was added in four portions over a period of 1 h at room temperature. The reaction mixture was heated to 50°C for 24 h. After cooling to room temperature, the resulting brown solution was poured into crushed ice to precipitate the solid. The precipitated solid was filtered, washed with water then with methanol, and finally dried under vacuum to afford grayish solid that will be used without further purification. Yield: 14.0 g, 80 %. <sup>1</sup>H NMR (600 MHz, DMSO-d<sub>6</sub>):  $\delta$ /ppm = 8.80 (s, 2H; ArH). Characterization data

matches literature values.

**Synthesis of 2,6-dibromonaphthalene-1,4,5,8-tetracarboxylic-N,N'-bis(octyl) diimide (S1).**

This was synthesized according to previously reported protocol.<sup>S2</sup> A mixture of 2,6-dibromo-1,4,5,8-naphthalenetetracarboxylic dianhydride (2.56 g, 6 mmol), 1-octylamine (3.10 g, 24 mmol) and acetic acid (100 mL) was stirred at 100 °C for 5 hours under nitrogen atmosphere. After cooling to room temperature, the precipitate was collected by filtration and washed with water and methanol. Recrystallization from chloroform furnished 2,6- dibromonaphthalene-1,4,5,8-tetracarboxylic-N,N'-bis(octyl) diimide as orange solid (1.8 g, 45 %). <sup>1</sup>H NMR (600 MHz, CDCl<sub>3</sub>):  $\delta$ /ppm = 9.00 (s, 2H; ArH), 4.19 (t,  $J$  = 7.2 Hz, 4H; NCH<sub>2</sub>), 1.74 (m, 4H; CH<sub>2</sub>), 1.23-1.45 (m, 20H; CH<sub>2</sub>), 0.88 (t,  $J$  = 6.6 Hz, 6H; CH<sub>3</sub>). Characterization data matches literature values.

**Synthesis of 2,6-dibromonaphthalene-1,4,5,8-tetracarboxylic-N,N'-bis(butyl) diimide (S2).**

The procedure was similar to that used to prepare 2,6-dibromonaphthalene-1,4,5,8-tetracarboxylic-N,N'-bis(octyl) diimide, except 1-butylamine (1.8 g, 24 mmol) was used in place of 1-octylamine. The desired product was isolated as orange solids (74%). <sup>1</sup>H NMR (600 MHz, CDCl<sub>3</sub>):  $\delta$ /ppm = 9.00 (s, 2H; ArH), 4.20 (t,  $J$  = 7.2 Hz, 4H; NCH<sub>2</sub>), 1.73 (m, 4H; CH<sub>2</sub>), 1.46 (m, 4H; CH<sub>2</sub>), 1.00 (t,  $J$  = 7.2 Hz, 6H; CH<sub>3</sub>).

**Synthesis of (A1<sup>2+</sup>)Br<sub>2</sub>.** A mixture of 2,6-dibromonaphthalene-1,4,5,8-tetracarboxylic-N,N'-bis(octyl) diimide (324 mg, 0.5 mmol), 4-benzoylpyridine (366 mg, 2.0 mmol) in dry dioxane (10 mL) was stirred at 100 °C for 48 hours under nitrogen atmosphere. After cooling down to room temperature, the reaction mixture was diluted with diethyl ether (40 mL). The precipitate was filtered, washed with dichloromethane (10 mL) and acetone (10 mL), and dried under vacuum at 50 °C for 4 h. The desired product was isolated as yellow solids (415 mg, 82 %). <sup>1</sup>H NMR (600 MHz, DMSO-*d*<sub>6</sub>):  $\delta$ /ppm = 9.64 (d,  $J$  = 6.0 Hz, 4H; C<sub>5</sub>H<sub>4</sub>N), 9.27 (s, 2H; ArH of NDI), 8.73 (d,  $J$  = 6.0 Hz, 4H; C<sub>5</sub>H<sub>4</sub>N), 7.97 (d,  $J$  = 7.8 Hz, 4H; C<sub>6</sub>H<sub>5</sub>), 7.90 (t,  $J$  = 7.8 Hz, 2H; C<sub>6</sub>H<sub>5</sub>), 7.74 (t,  $J$  = 7.8 Hz, 4H; C<sub>6</sub>H<sub>5</sub>), 3.98 (br, 4H; NCH<sub>2</sub>), 1.60 (m, 4H; CH<sub>2</sub>), 1.40-1.20 (m, 20H; CH<sub>2</sub>), 0.85 (m, 6H; CH<sub>3</sub>). <sup>13</sup>C NMR (150 MHz, DMSO-*d*<sub>6</sub>):  $\delta$  = 192.57, 161.24, 160.82, 154.88, 147.43, 142.98, 135.66, 134.62, 131.71, 130.84, 129.73, 128.05, 127.76, 127.06, 122.09, 41.10, 31.66, 29.06, 28.99, 27.57, 26.85, 22.52, 14.39. HRMS:  $m/z$  calculated for C<sub>54</sub>H<sub>54</sub>N<sub>4</sub>O<sub>6</sub><sup>2+</sup> [M-2Br]<sup>2+</sup> 427.2016, found 427.2018.

**Synthesis of (B1<sup>2+</sup>)Br<sub>2</sub>.** The procedure was similar to that used to prepare **A1**, except 4-acetylpyridine (242 mg, 2.00 mmol) was used in place of 4-benzoylpyridine. The desired product was isolated as yellow solids (392 mg, 88 %). <sup>1</sup>H NMR (600 MHz, DMSO-*d*<sub>6</sub>): δ/ppm = 9.68 (br, 4H; C<sub>5</sub>H<sub>4</sub>N), 9.20 (s, 2H; ArH of NDI), 8.82 (br, 4H; C<sub>5</sub>H<sub>4</sub>N), 3.92 (br, 4H; NCH<sub>2</sub>), 2.91 (s, 6H; CH<sub>3</sub>), 1.56 (br, 4H; CH<sub>2</sub>), 1.35-1.15 (br, 20H; CH<sub>2</sub>), 0.85 (m, 6H; CH<sub>3</sub>). No well-resolved <sup>13</sup>C NMR spectrum could be obtained due to its limited solubility. HRMS: m/z calculated for C<sub>44</sub>H<sub>50</sub>N<sub>4</sub>O<sub>6</sub><sup>2+</sup> [M-2Br]<sup>2+</sup> 365.1860, found 365.1864.

**Synthesis of (C1<sup>2+</sup>)Br<sub>2</sub>.** The procedure was similar to that used to prepare **A1**, except ethyl isonicotinate (302 mg, 2.00 mmol) was used in place of 4-benzoylpyridine. The desired product was isolated as yellow solids (427 mg, 90 %). <sup>1</sup>H NMR (600 MHz, DMSO-*d*<sub>6</sub>): δ/ppm = 9.66 (br, 4H; C<sub>5</sub>H<sub>4</sub>N), 9.21 (s, 2H; ArH of NDI), 8.85 (br, 4H; C<sub>5</sub>H<sub>4</sub>N), 4.56 (m, 4H; OCH<sub>2</sub>), 3.92 (br, 4H; NCH<sub>2</sub>), 1.56 (br, 4H; CH<sub>2</sub>), 1.46 (m, 6H; OCH<sub>2</sub>CH<sub>3</sub>), 1.35-1.15 (m, 20H; CH<sub>2</sub>), 0.85 (t, *J* = 6.6 Hz, 6H; CH<sub>3</sub>). <sup>13</sup>C NMR (150 MHz, DMSO-*d*<sub>6</sub>): δ (ppm) = 162.58, 161.15, 160.78, 148.12, 146.61, 142.81, 131.61, 127.92, 127.71, 127.45, 122.11, 63.81, 41.08, 31.64, 29.05, 28.96, 27.52, 26.84, 22.50, 14.41, 14.38. HRMS: m/z calculated for C<sub>46</sub>H<sub>54</sub>N<sub>4</sub>O<sub>8</sub><sup>2+</sup> [M-2Br]<sup>2+</sup> 395.1965, found 395.1969.

**Synthesis of (A2<sup>2+</sup>)Br<sub>2</sub>.** The procedure was similar to that used to prepare **A1**, except **S2** (268 mg, 0.5 mmol) and DMF (10 mL) was used in place of **S1** and dioxane. The desired product was isolated as yellow solids (334 mg, 74 %). <sup>1</sup>H NMR (600 MHz, DMSO-*d*<sub>6</sub>): δ/ppm = 9.66 (d, *J* = 6.0 Hz, 4H; pyridine), 9.27 (s, 2H; ArH of NDI), 8.72 (d, 4H, *J* = 6.6 Hz; pyridine), 7.96 (d, 4H, *J* = 7.8 Hz; C<sub>6</sub>H<sub>5</sub>), 7.89 (t, 2H, *J* = 7.2 Hz; C<sub>6</sub>H<sub>5</sub>), 7.74 (t, 4H, *J* = 7.8 Hz; C<sub>6</sub>H<sub>5</sub>), 4.00 (t, 4H, *J* = 7.8 Hz; NCH<sub>2</sub>), 1.60 (m, 4H; NCH<sub>2</sub>CH<sub>2</sub>), 1.35 (m, 4H; CH<sub>2</sub>CH<sub>3</sub>), 0.91 (t, *J* = 7.2 Hz; 6H; CH<sub>2</sub>CH<sub>3</sub>). <sup>13</sup>C NMR (150 MHz, DMSO-*d*<sub>6</sub>): δ = 192.61, 161.27, 160.84, 154.87, 147.42, 142.97, 135.67, 134.63, 131.72, 130.85, 129.73, 128.05, 127.77, 127.07, 122.09, 40.89, 29.75, 20.17, 14.12. HRMS: m/z calculated for C<sub>46</sub>H<sub>38</sub>N<sub>4</sub>O<sub>6</sub><sup>2+</sup> [M-2Br]<sup>2+</sup> 371.1390, found 371.1387.

**Synthesis of (B2<sup>2+</sup>)Br<sub>2</sub>.** The procedure was similar to that used to prepare **B1**, except **S2** (268 mg, 0.5 mmol) was used in place of **S1**. The desired product was isolated as yellow solids (310 mg, 80 %). <sup>1</sup>H NMR (600 MHz, DMSO-*d*<sub>6</sub>): δ/ppm = 9.66 (br, 4H; pyridine), 9.18 (s, 2H; ArH of NDI), 8.81 (s, 4H; pyridine), 3.93 (s, 4H; NCH<sub>2</sub>), 2.89 (s, 6H; COCH<sub>3</sub>), 1.54 (m, 4H; NCH<sub>2</sub>CH<sub>2</sub>), 1.31 (m, 4H; CH<sub>2</sub>CH<sub>3</sub>) 0.87 (t, 6H, *J* = 7.2 Hz; CH<sub>2</sub>CH<sub>3</sub>). No well-resolved <sup>13</sup>C NMR spectrum could be obtained

due to its limited solubility. HRMS:  $m/z$  calculated for  $C_{36}H_{34}N_4O_6^{2+}$   $[M-2Br]^{2+}$  309.1234, found 309.1230.

**Synthesis of  $(C2^{2+})Br_2$ .** The procedure was similar to that used to prepare **C1**, except **S2** (268 mg, 0.5 mmol) was used in place of **S1**. The desired product was isolated as yellow solids (343 mg, 82 %).  $^1H$  NMR (600 MHz,  $DMSO-d_6$ ):  $\delta/ppm$  = 9.64 (d, 4H,  $J$  = 6.6 Hz; pyridine), 9.21 (s, 2H; ArH of NDI), 8.85 (d, 4H,  $J$  = 6.6 Hz; pyridine), 4.56 (q, 4H,  $J$  = 6.6 Hz;  $OCH_2$ ), 3.94 (t, 4H,  $J$  = 7.2 Hz;  $NCH_2$ ), 1.55 (m, 4H;  $NCH_2CH_2$ ), 1.46 (t, 6H,  $J$  = 7.2 Hz;  $OCH_2CH_3$ ), 1.32 (m, 4H;  $CH_2CH_3$ ), 0.89 (t, 6H,  $J$  = 7.2 Hz;  $CH_2CH_3$ ).  $^{13}C$  NMR (150 MHz,  $DMSO-d_6$ ):  $\delta$  (ppm) = 162.11, 160.68, 160.31, 147.64, 146.11, 142.28, 131.13, 127.43, 127.25, 126.96, 121.64, 63.30, 39.52, 29.19, 19.69, 13.93, 13.63. No well-resolved  $^{13}C$  NMR spectrum could be obtained due to its limited solubility.  $m/z$  HRMS: calculated for  $C_{38}H_{38}N_4O_8^{2+}$   $[M-2Br]^{2+}$  340.1236, found 340.1231.

**Battery Fabrication and Testing.** The working electrodes were prepared by casting slurries containing 50 wt % active materials, 40 wt % conductive carbon black (ECP-600JD) and 10 wt % poly(vinylidene fluoride) (PVDF) binder on carbon paper with a diameter of 12 mm. The average loading of active materials in each pallet was about 0.4-0.6  $mg\ cm^{-2}$ . The fully prepared electrodes were then dried at 80 °C overnight in a vacuum oven in order to remove any residual solvent. The CR2032-type coin cells were assembled with the cathode pellet, a Celgard 2400 membrane separator, a lithium foil anode and 2.0 mol/L  $LiClO_4$ /tetraglyme (G4) as electrolyte solution. All the cells were assembled in an argon-filled glove box (< 0.1 ppm of oxygen and < 0.01 ppm of water). The batteries were stood for 12 h before testing. The galvanostatic charge/discharge tests at different current densities are performed on LAND CT2001A battery system at 30°C within the voltage window of 1.2-3.8V. Cyclic voltammetry and electrochemical impedance spectroscopy were performed with the coin cells using an electrochemical workstation (CHI760E). Electrochemical impedance spectroscopy was performed at a frequency range of 100 kHz to 0.1 Hz.

## Calculations of the Electrochemical Metrics

Theoretical capacity ( $C_{\text{theor}}$ , mAh g<sup>-1</sup>) was calculated according to the equation (1):

$$C_{\text{theor}} = \frac{nF}{3.6 \times M} \quad (1)$$

where  $n$  is the number of electrons transferred per molecules,  $F$  is the Faraday's constant (96484 C mol<sup>-1</sup>),  $M$  is molecular weight of the molecules (for small molecules) or repeating unit (for polymers).

The  $b$ -value and capacitive contribution at a particular potential were determined as follows:

The relationship between scan rate ( $v$ , mV s<sup>-1</sup>) in a CV and the corresponding cathodic or anodic peak current ( $i_p$ , A g<sup>-1</sup>) is shown in equation (2).<sup>S3</sup> The  $b$ -value was the slope of the  $\log(v)$ - $\log(i_p)$  plots according to equation (3).

$$i_p = av^b \quad (2)$$

$$\log(i_p) = \log(a) + b \log(v) \quad (3)$$

where  $a$  and  $b$  are adjustable parameters.

Moreover, the relationship between the current at a particular potential ( $i(V)$ , A g<sup>-1</sup>) and the scan rate ( $v$ , mV s<sup>-1</sup>) is shown in equation (4).<sup>S4</sup> Solving for the values of  $k_1$  and  $k_2$  at each potential, we can obtain the percentage of capacitive contribution the total current ( $k_2v/i(V)$ ).

$$i(V) = k_1v^{1/2} + k_2v \quad (4)$$

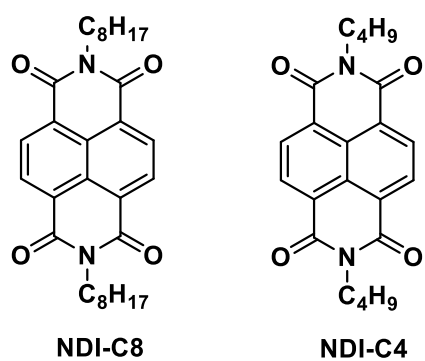

**Scheme S1.** Structure of **NDI-C8** and **NDI-C4** used in this work as prototype compounds.

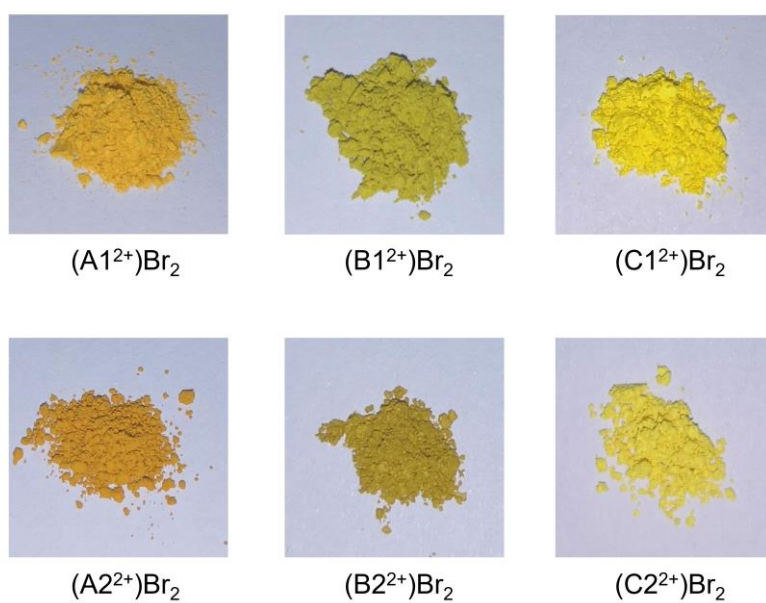

**Figure S1.** Pictures of the six compounds.

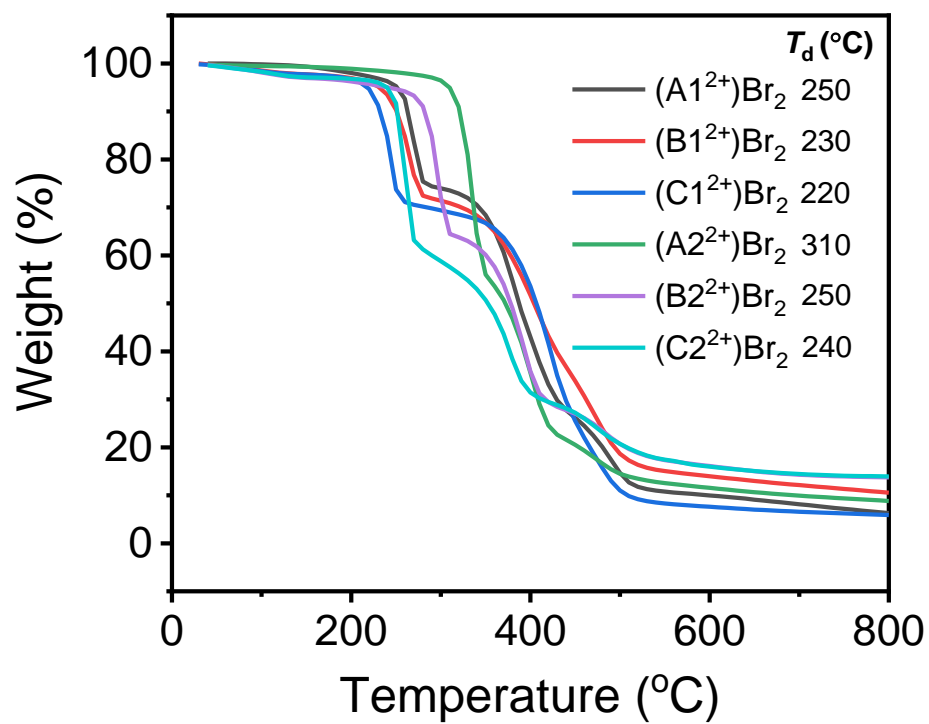

**Figure S2.** TGA of six NDI-carbonylpyridinium conjugates.



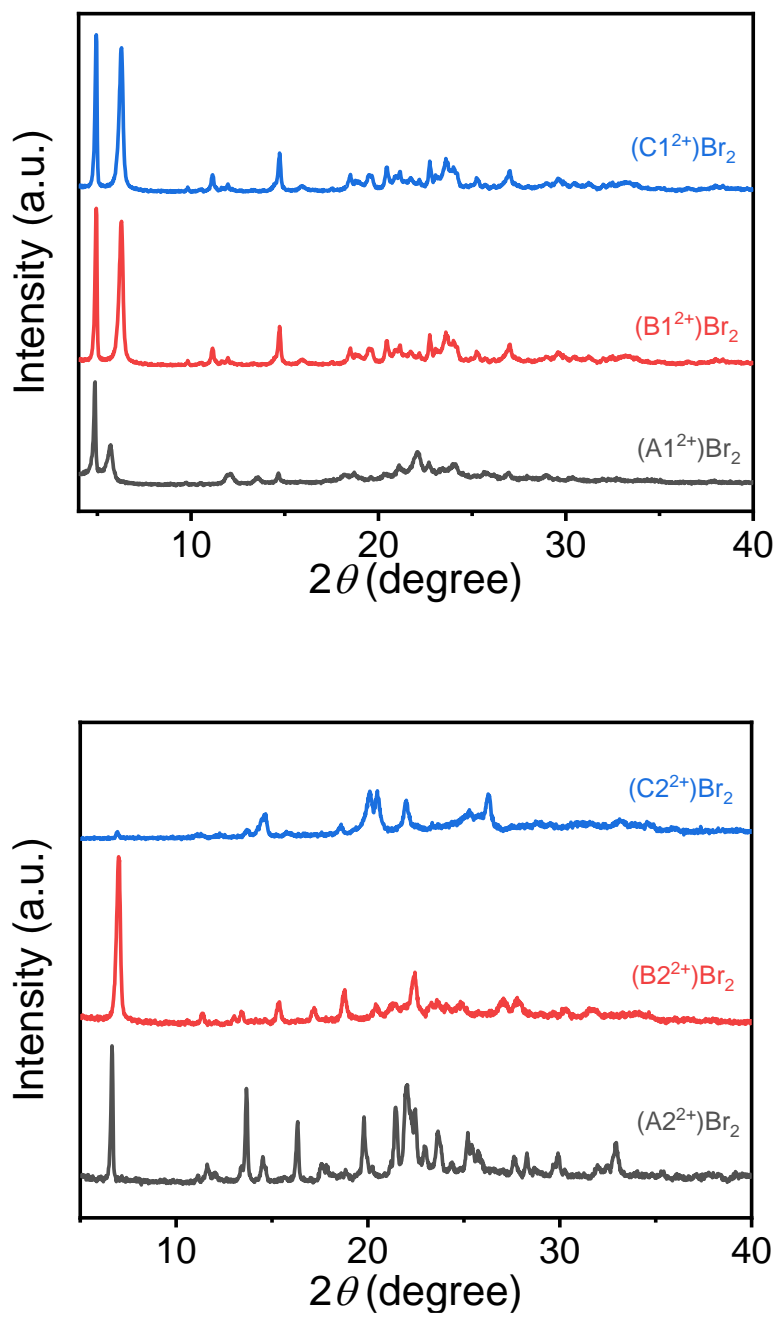

**Figure S3.** XRD of six NDI-carboxypyridinium conjugates.

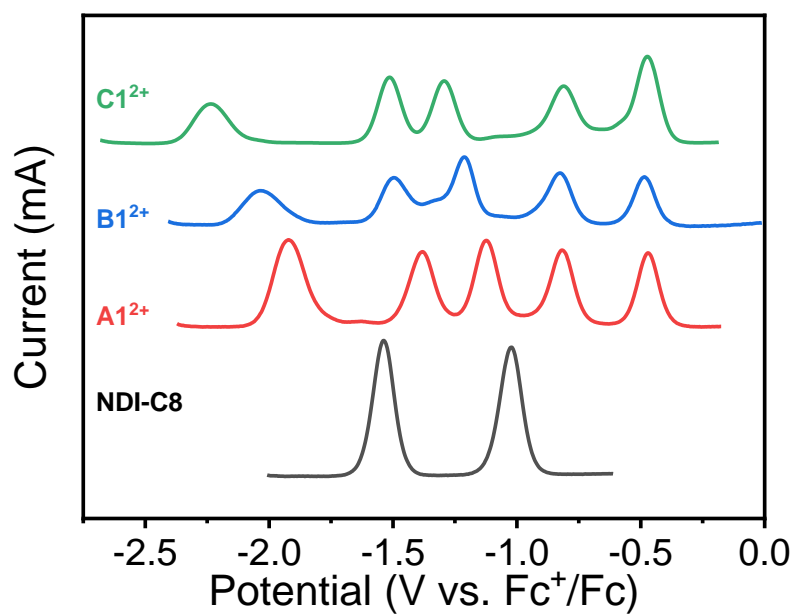

**Figure S4.** DPVs of  $A1^{2+}$ ,  $B1^{2+}$ ,  $C1^{2+}$  and **NDI-C8** in DMF solution ( $c = 1$  mM), with 0.1 M  $TBAPF_6$  as the electrolyte. DPV parameters: Increase  $E = 4$  mV, amplitude = 50 mV, pulse width = 60.0 ms, sampling width = 20.0 ms, pulse period = 500.0 ms. The structure of **NDI-C8** is shown in Scheme S1.

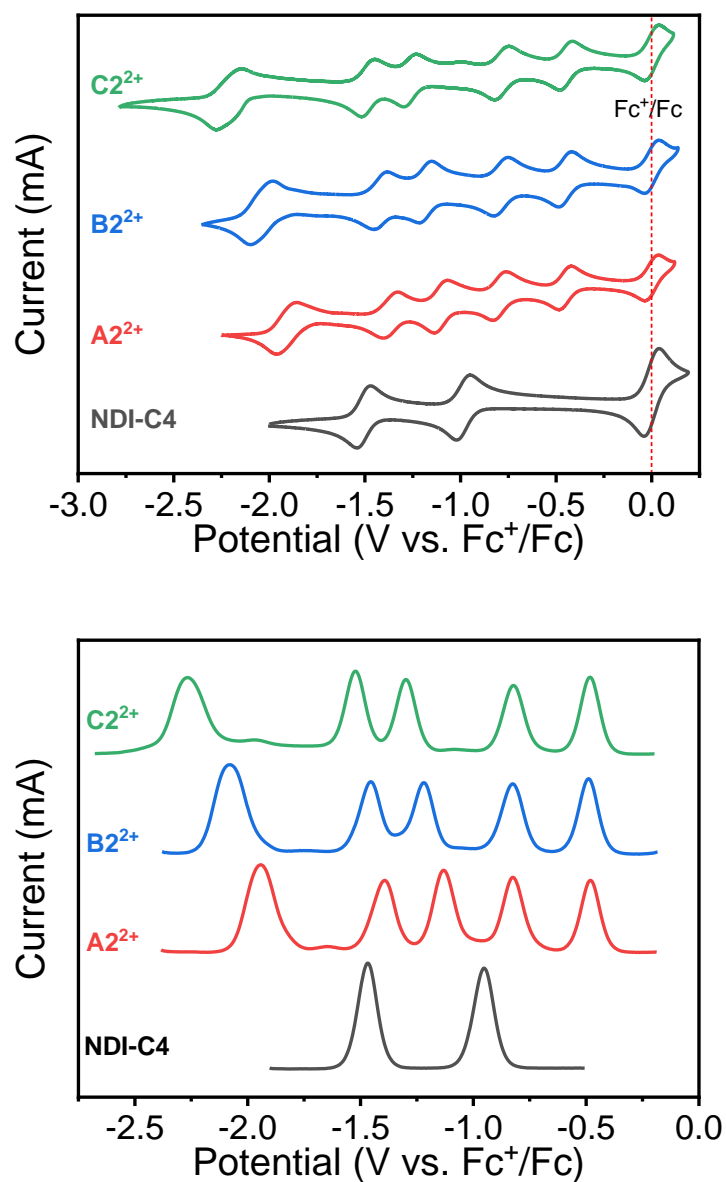

**Figure S5.** (Top) CVs and (bottom) DPVs of **A2<sup>2+</sup>**, **B2<sup>2+</sup>**, **C2<sup>2+</sup>** and **NDI-C4** in DMF solution ( $c = 1$  mM), with 0.1 M TBAPF<sub>6</sub> as the electrolyte. The scan rate of CV was 100 mV s<sup>-1</sup>. DPV parameters: Increase  $E = 4$  mV, amplitude = 50 mV, pulse width = 60.0 ms, sampling width = 20.0 ms, pulse period = 500.0 ms. The structure of **NDI-C4** is shown in Scheme S1.

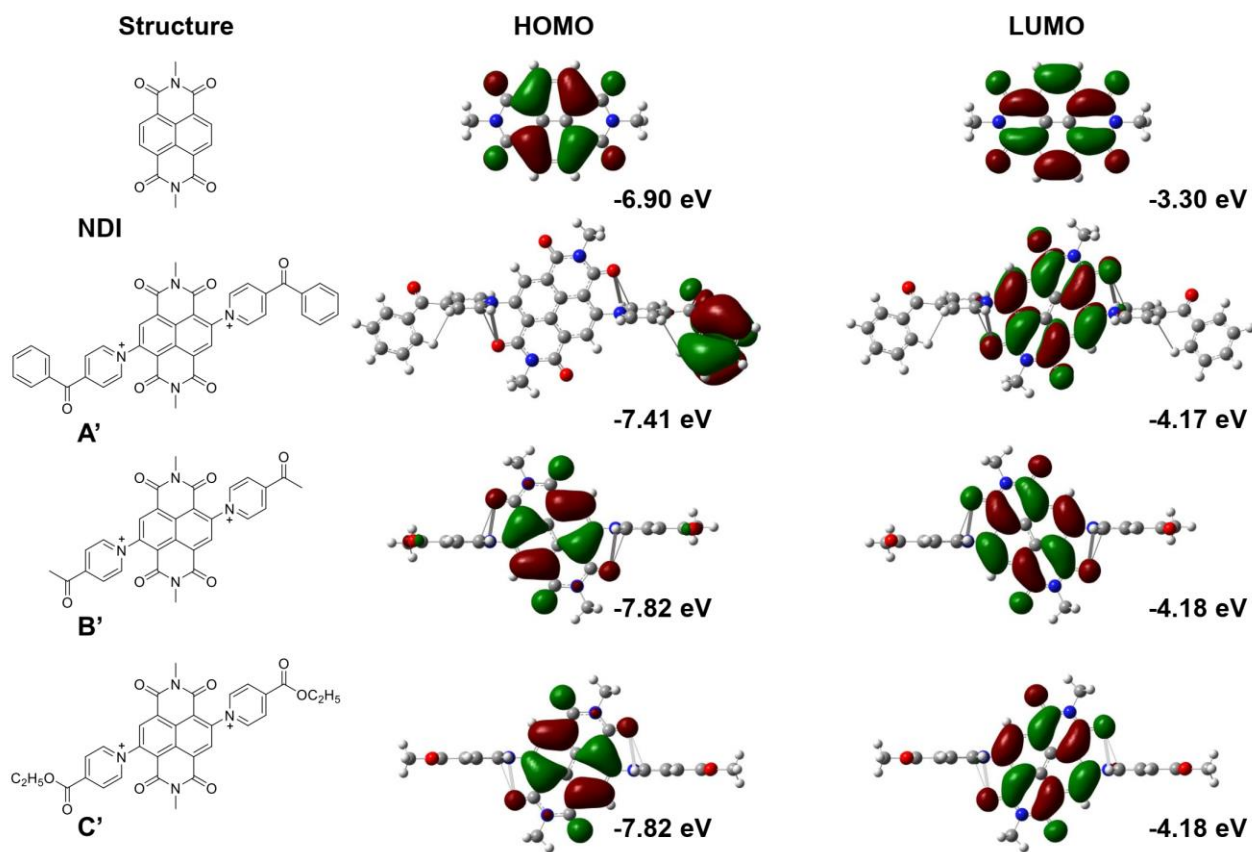

**Figure S6.** Structures of NDI, A', B' and C', as well as frontier molecular orbitals and their calculated energies.

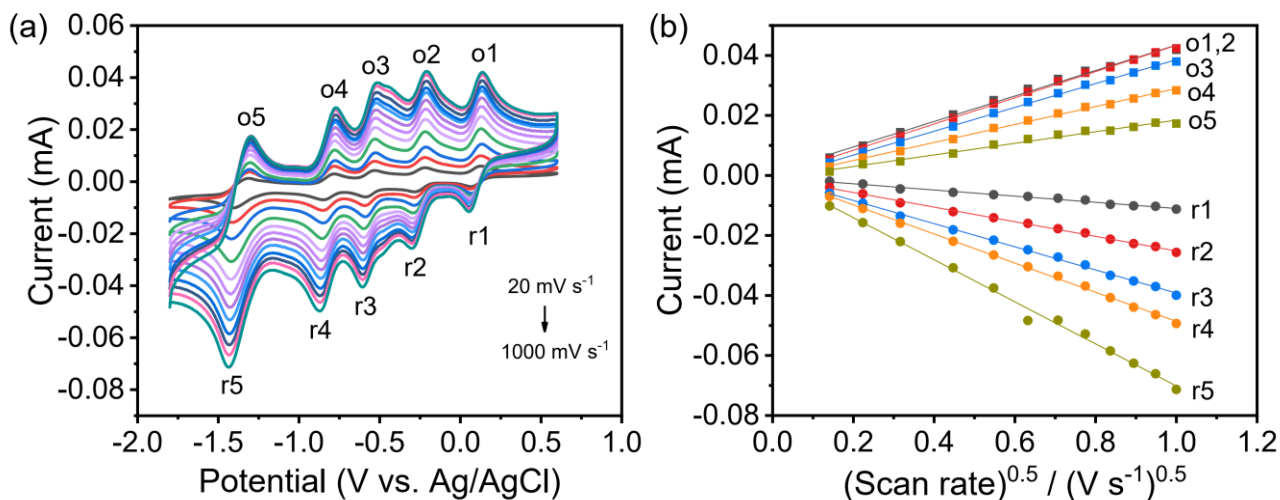

**Figure S7.** (a) Cyclic voltammograms of  $A1^{2+}$  (1 mM) in DMF solution at varying scan rates (20, 50, 100, 200, 300, 400, 500, 600, 700, 800, 900, 1000  $mV s^{-1}$ ; peak height increases with increasing scan rate).  $nBu_4PF_6$  (0.1 M) as supporting electrolyte. (b) Linear plots of peak current vs. square root of the scan rate.

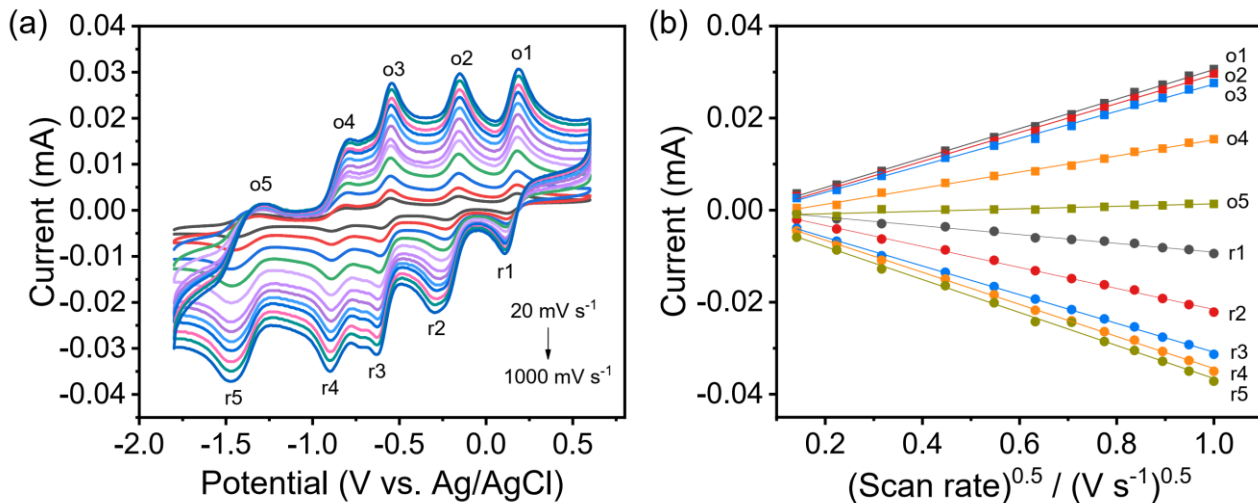

**Figure S8.** (a) Cyclic voltammograms of  $B1^{2+}$  (1 mM) in DMF solution at varying scan rates (20, 50, 100, 200, 300, 400, 500, 600, 700, 800, 900, 1000  $mV s^{-1}$ ; peak height increases with increasing scan rate).  $nBu_4PF_6$  (0.1 M) as supporting electrolyte. (b) Linear plots of peak current vs. square root of the scan rate.

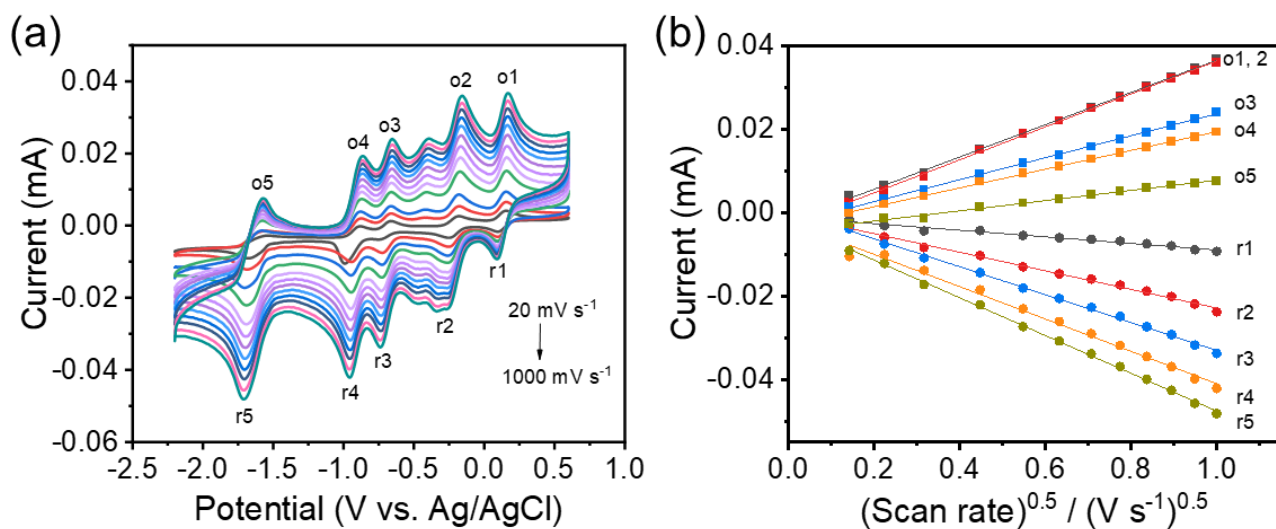

**Figure S9.** (a) Cyclic voltammograms of  $\text{Cl}^{2+}$  (1 mM) in DMF solution at varying scan rates (20, 50, 100, 200, 300, 400, 500, 600, 700, 800, 900, 1000  $\text{mV s}^{-1}$ ; peak height increases with increasing scan rate).  $n\text{Bu}_4\text{PF}_6$  (0.1 M) as supporting electrolyte. (b) Linear plots of peak current vs. square root of the scan rate.

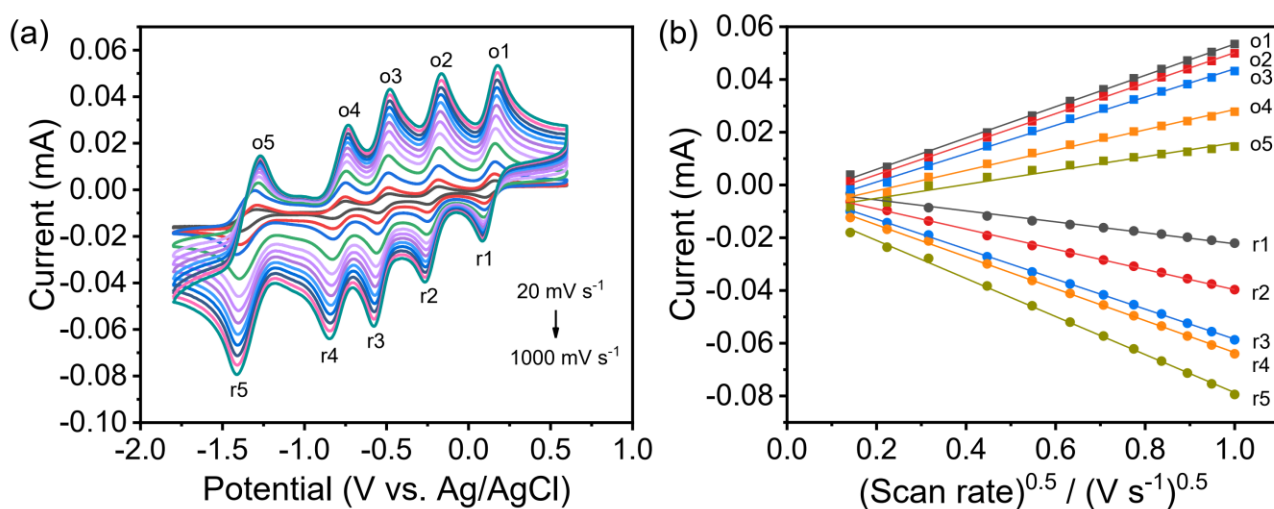

**Figure S10.** (a) Cyclic voltammograms of  $\text{A}^{2+}$  (1 mM) in DMF solution at varying scan rates (20, 50, 100, 200, 300, 400, 500, 600, 700, 800, 900, 1000  $\text{mV s}^{-1}$ ; peak height increases with increasing scan rate).  $n\text{Bu}_4\text{PF}_6$  (0.1 M) as supporting electrolyte. (b) Linear plots of peak current vs. square root of the scan rate.

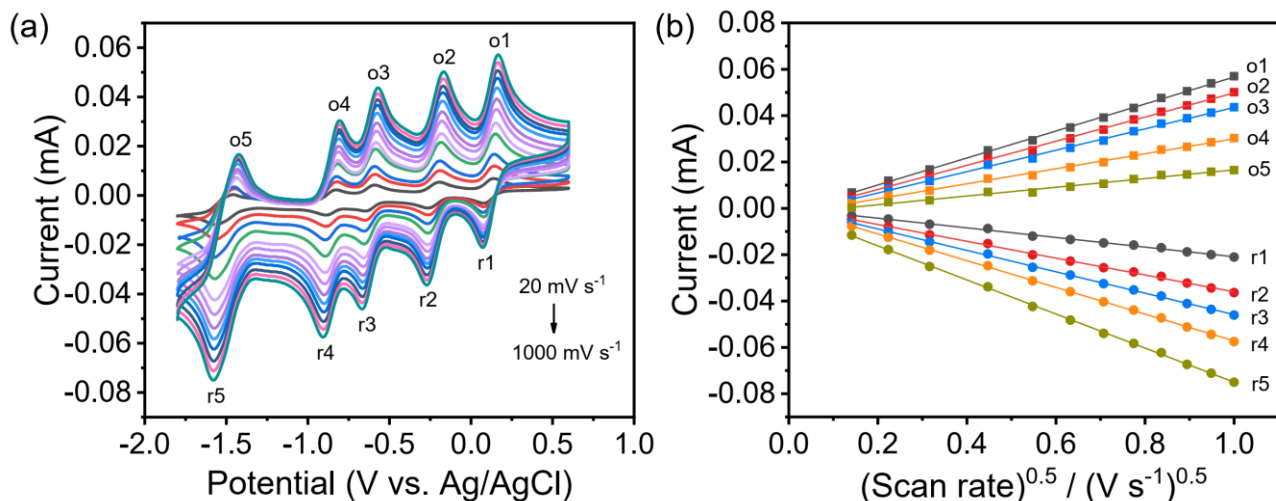

**Figure S11.** (a) Cyclic voltammograms of  $B^{2+}$  (1 mM) in DMF solution at varying scan rates (20, 50, 100, 200, 300, 400, 500, 600, 700, 800, 900, 1000  $mV s^{-1}$ ; peak height increases with increasing scan rate).  $nBu_4PF_6$  (0.1 M) as supporting electrolyte. (b) Linear plots of peak current vs. square root of the scan rate.

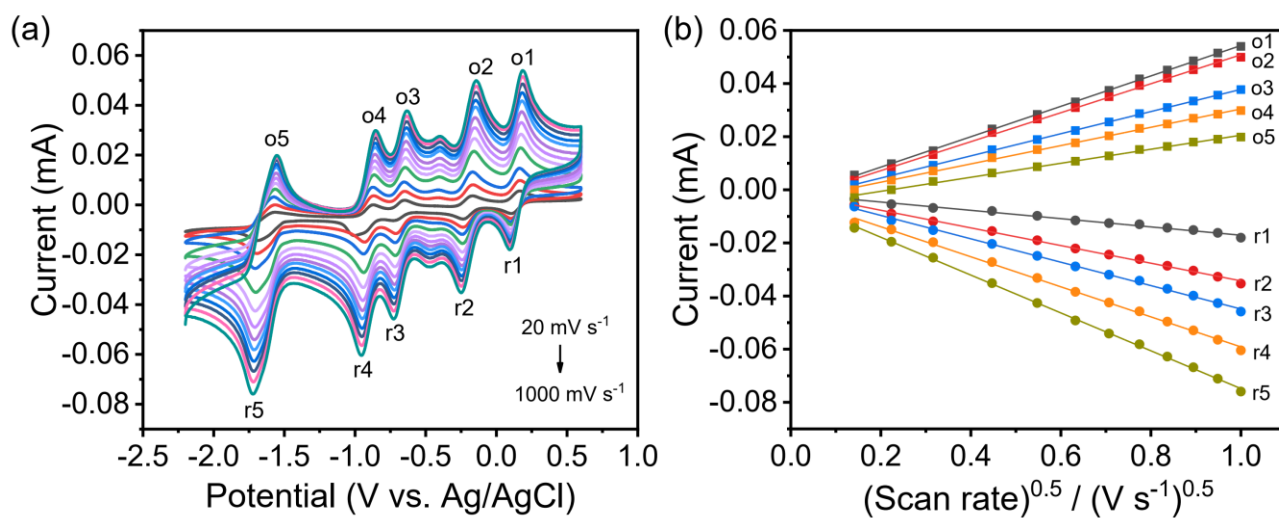

**Figure S12.** (a) Cyclic voltammograms of  $C^{2+}$  (1 mM) in DMF solution at varying scan rates (20, 50, 100, 200, 300, 400, 500, 600, 700, 800, 900, 1000  $mV s^{-1}$ ; peak height increases with increasing scan rate).  $nBu_4PF_6$  (0.1 M) as supporting electrolyte. (b) Linear plots of peak current vs. square root of the scan rate.

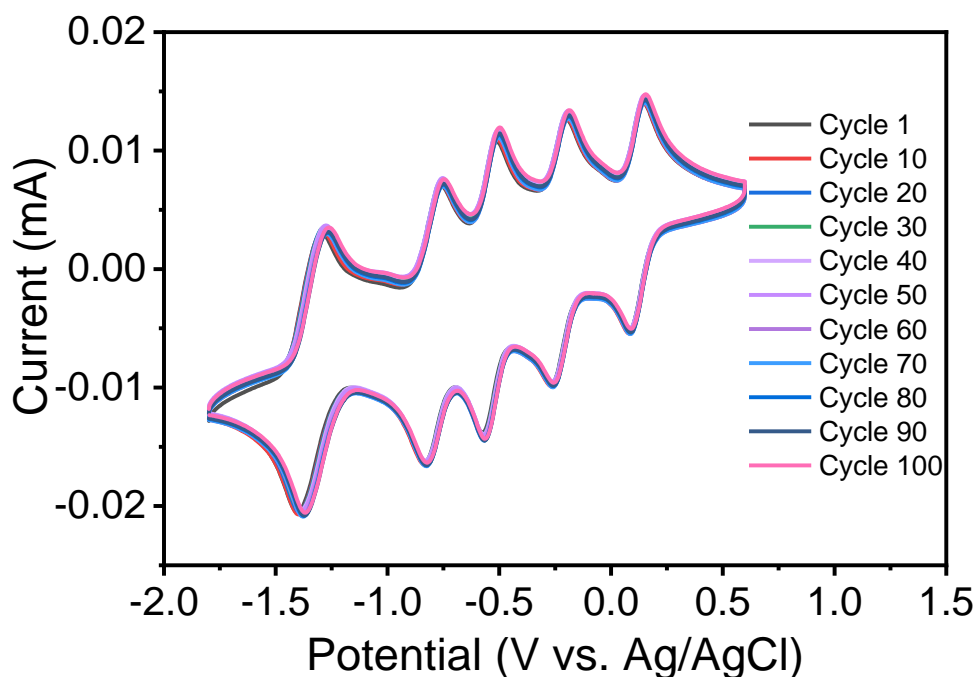

**Figure S13.** Test of electrochemical stability. CV curves of  $\text{Al}^{12+}$  (1 mM) in degassed DMF solution with  $\text{NBu}_4\text{PF}_6$  (0.1 M) as supporting electrolyte after 100 continuous cycles at a scan rate of 100 mV/s.

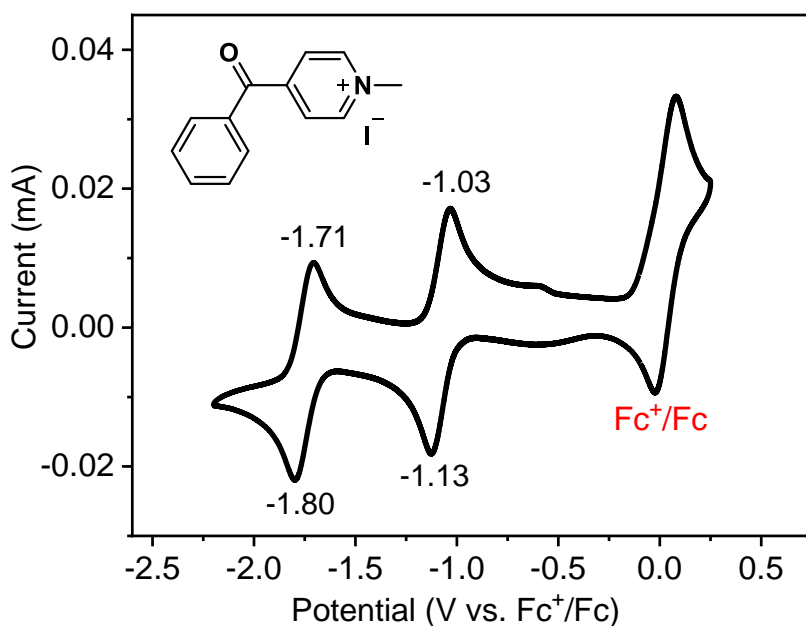

**Figure S14.** CV of **BMP** (1 mM) in DMF solution.  $\text{NBu}_4\text{PF}_6$  (0.1 M) as supporting electrolyte; referenced vs.  $\text{Fc}^+/\text{Fc}$ . Inset shows the chemical structure of **BMP**.



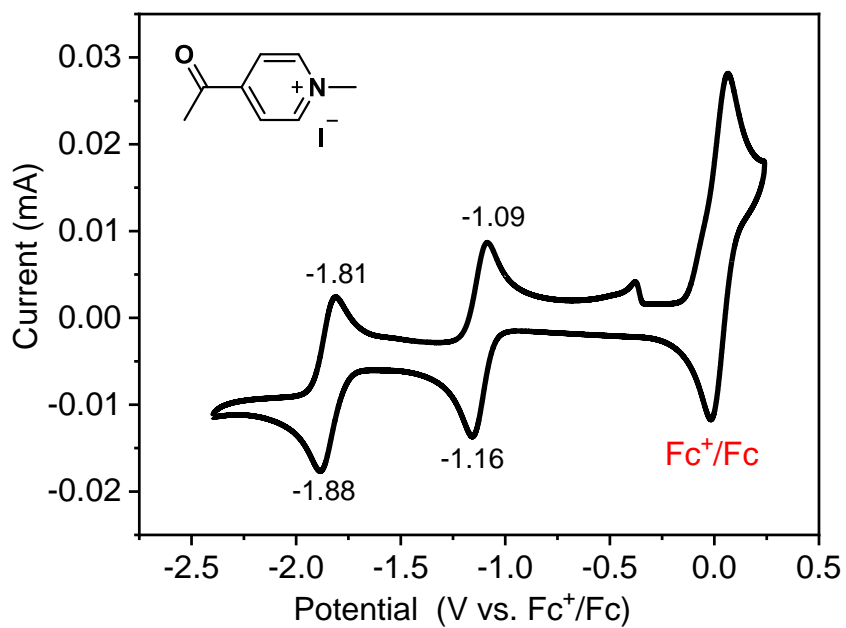

**Figure S15.** CV of **EMP** (1 mM) in DMF solution. NBu<sub>4</sub>PF<sub>6</sub> (0.1 M) as supporting electrolyte; referenced vs. Fc<sup>+</sup>/Fc. Inset shows the chemical structure of **EMP**.

## Solubility Test

Their solubility was determined by UV spectrophotometry by soaking the compounds in G4 (tetraglyme) electrolyte for 24 h and then they were filtered before measurement (Figure S16). Based on the UV-vis data, the solubility follow the trend of  $(A2^{2+})Br_2 < (C2^{2+})Br_2 < (B2^{2+})Br_2$ .

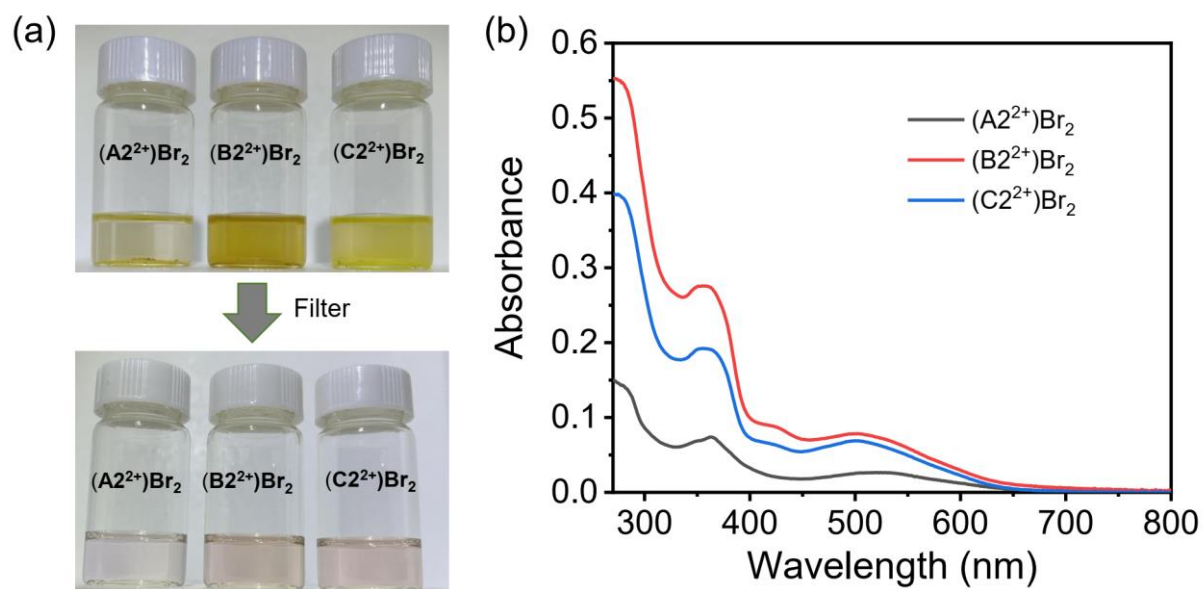

**Figure S16.** (a) The photographs of  $(A2^{2+})Br_2$ ,  $(B2^{2+})Br_2$  and  $(C2^{2+})Br_2$  in electrolyte solution (G4, tetraglyme, 0.4 mg/mL) before and after filtering. (b) UV-vis spectra of  $(A2^{2+})Br_2$ ,  $(B2^{2+})Br_2$  and  $(C2^{2+})Br_2$  in G4. The samples were soaked in G4 for 24 h before filtering and measurement.

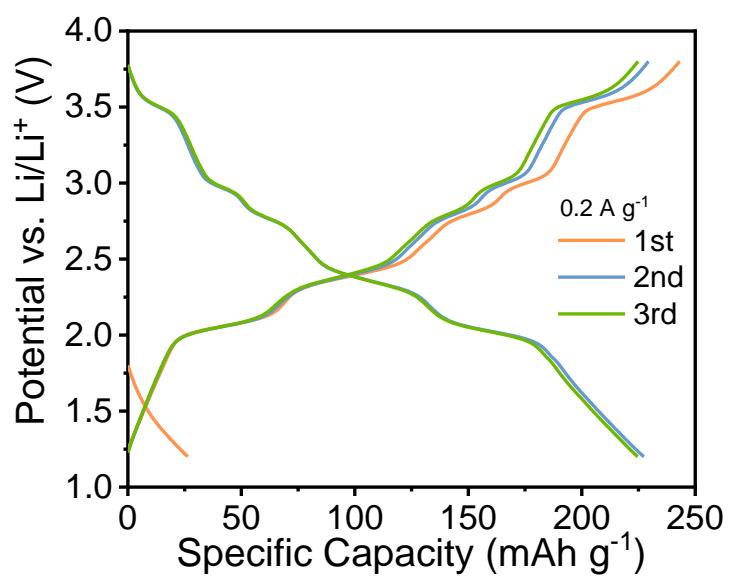

**Figure S17.** Galvanostatic charge-discharge profiles of  $(A^{2+})Br_2$  during the first three cycles at 0.2 A g<sup>-1</sup>.

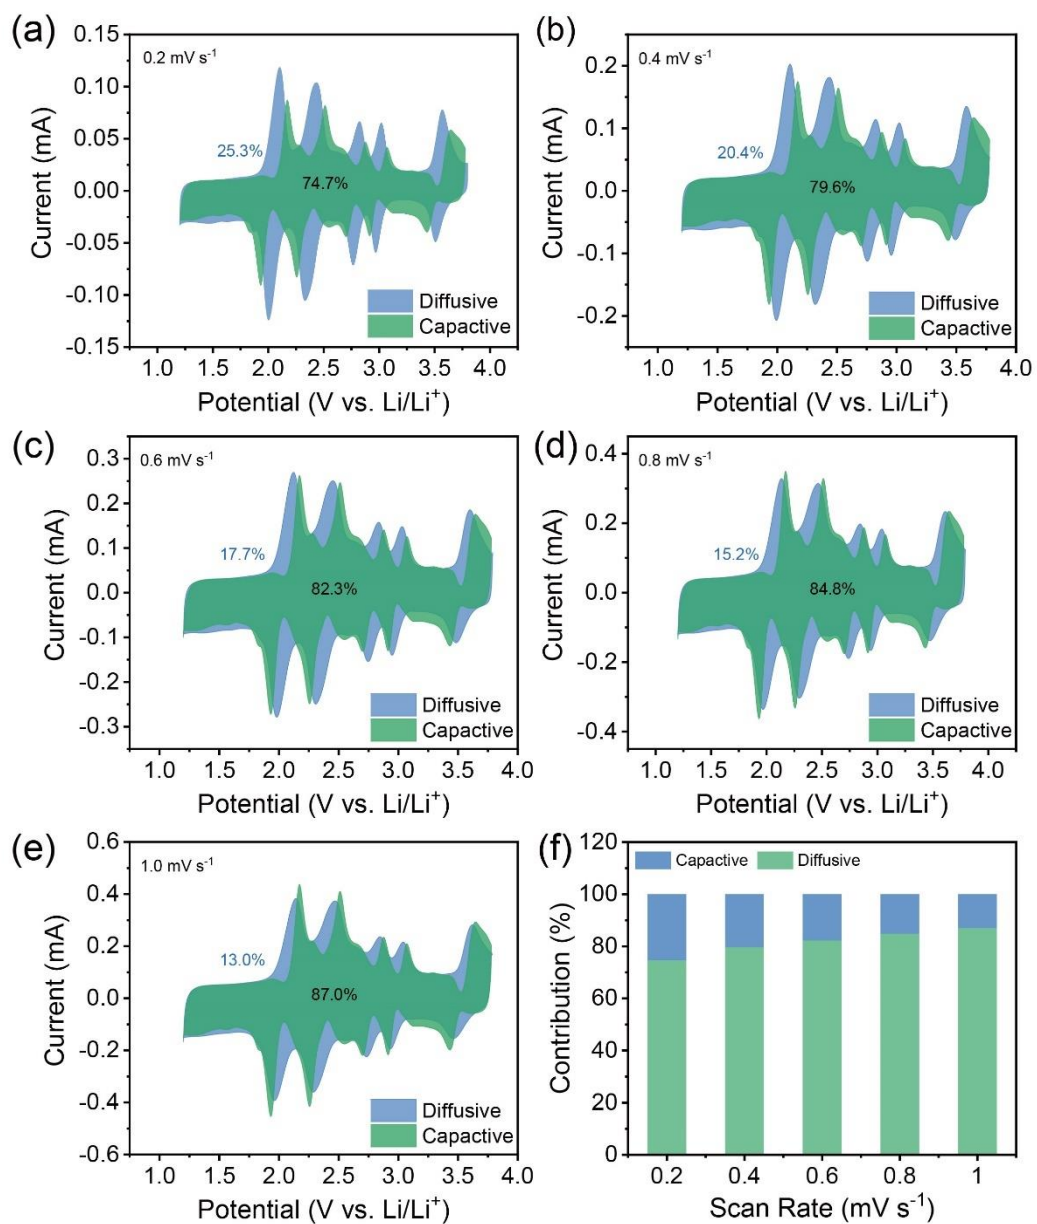

**Figure S18.** Capacitive and diffusive contributions of [A2]Br<sub>2</sub> at various scan rates.

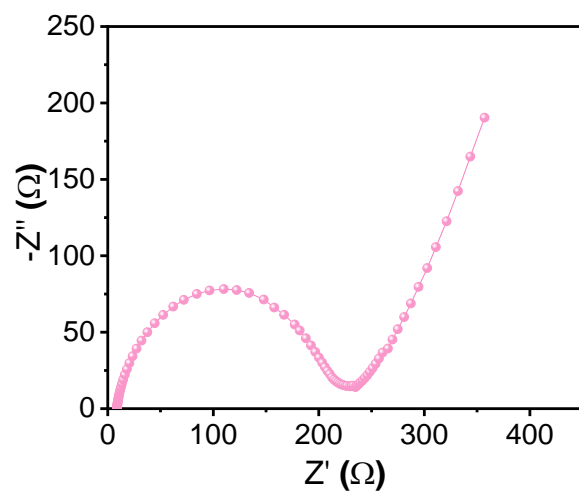

**Figure S19.** EIS spectra of (A<sup>2+</sup>)Br<sub>2</sub> electrodes before cycling.

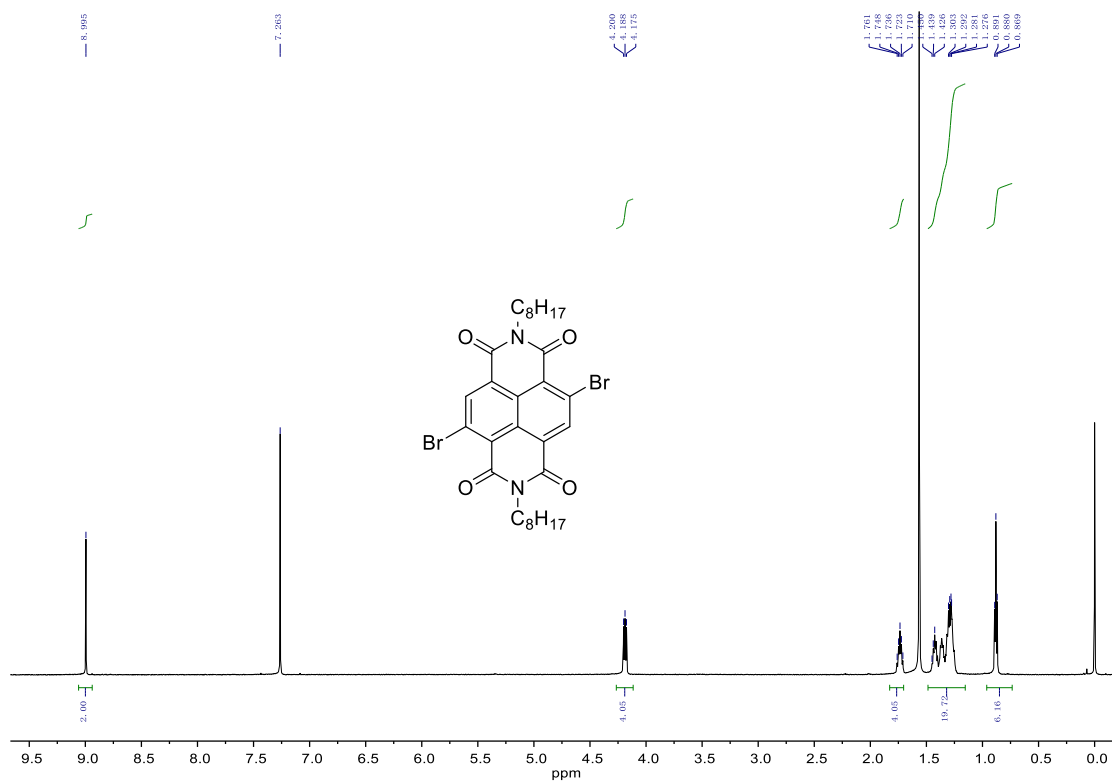

Figure S20. <sup>1</sup>H NMR spectrum of S1 in CDCl<sub>3</sub>.

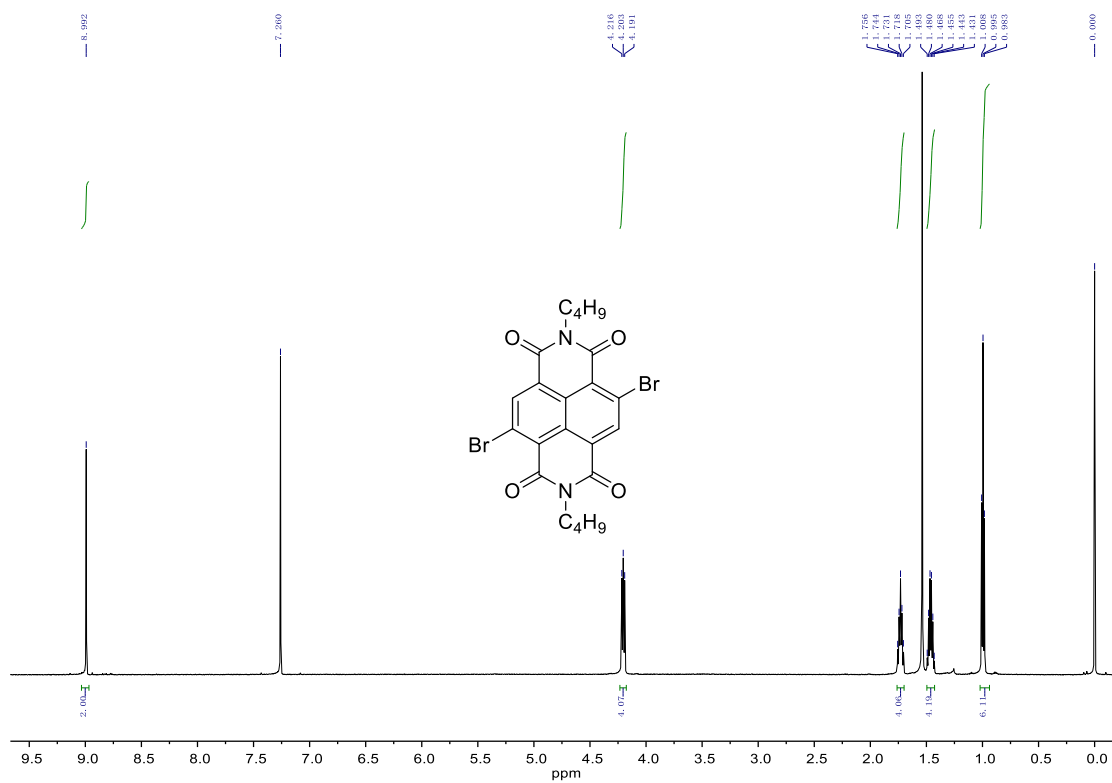

Figure S21. <sup>1</sup>H NMR spectrum of S2 in CDCl<sub>3</sub>.

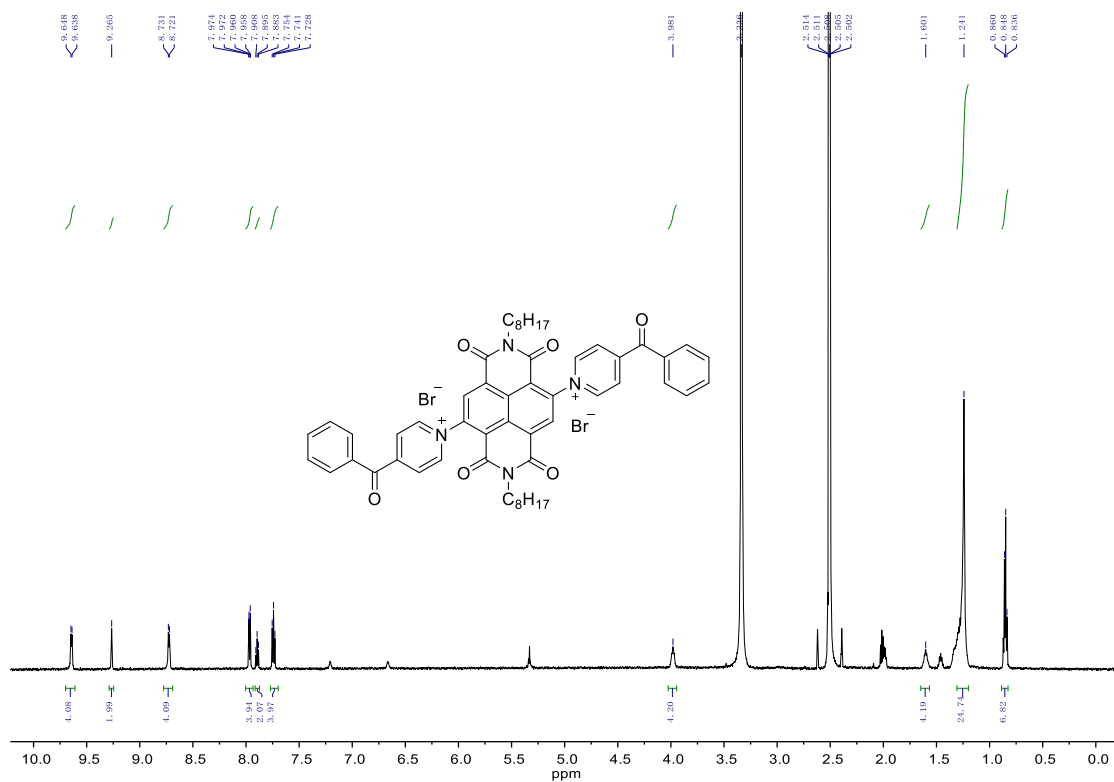

**Figure S22.  $^1\text{H}$  NMR spectrum of  $(\text{A1}^{2+})\text{Br}_2$  in  $\text{d}_6\text{-DMSO}$ .**

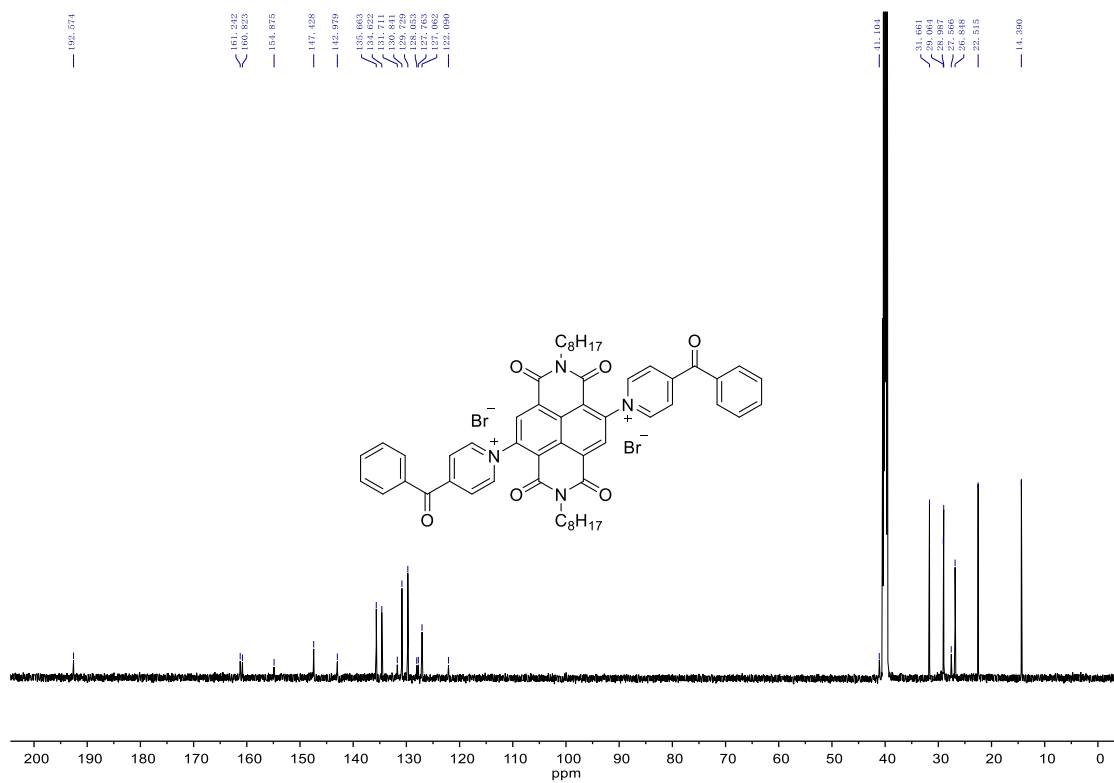

**Figure S23.  $^{13}\text{C}$  NMR spectrum of  $(\text{A1}^{2+})\text{Br}_2$  in  $\text{d}_6\text{-DMSO}$ .**

## Display Report

### Analysis Info

Analysis Name D:\Data\2022\0808\LQT-1a.d  
Method pos\_low-20151116.m  
Sample Name linqiting  
Comment

Acquisition Date 2022-08-08 10:40:57  
Operator Fan  
Instrument maXis 10103

### Acquisition Parameter

|             |            |                       |           |                  |           |
|-------------|------------|-----------------------|-----------|------------------|-----------|
| Source Type | ESI        | Ion Polarity          | Positive  | Set Nebulizer    | 0.4 Bar   |
| Focus       | Not active | Set Capillary         | 4000 V    | Set Dry Heater   | 180 °C    |
| Scan Begin  | 100 m/z    | Set End Plate Offset  | -500 V    | Set Dry Gas      | 4.0 l/min |
| Scan End    | 1000 m/z   | Set Collision Cell RF | 200.0 Vpp | Set Divert Valve | Waste     |

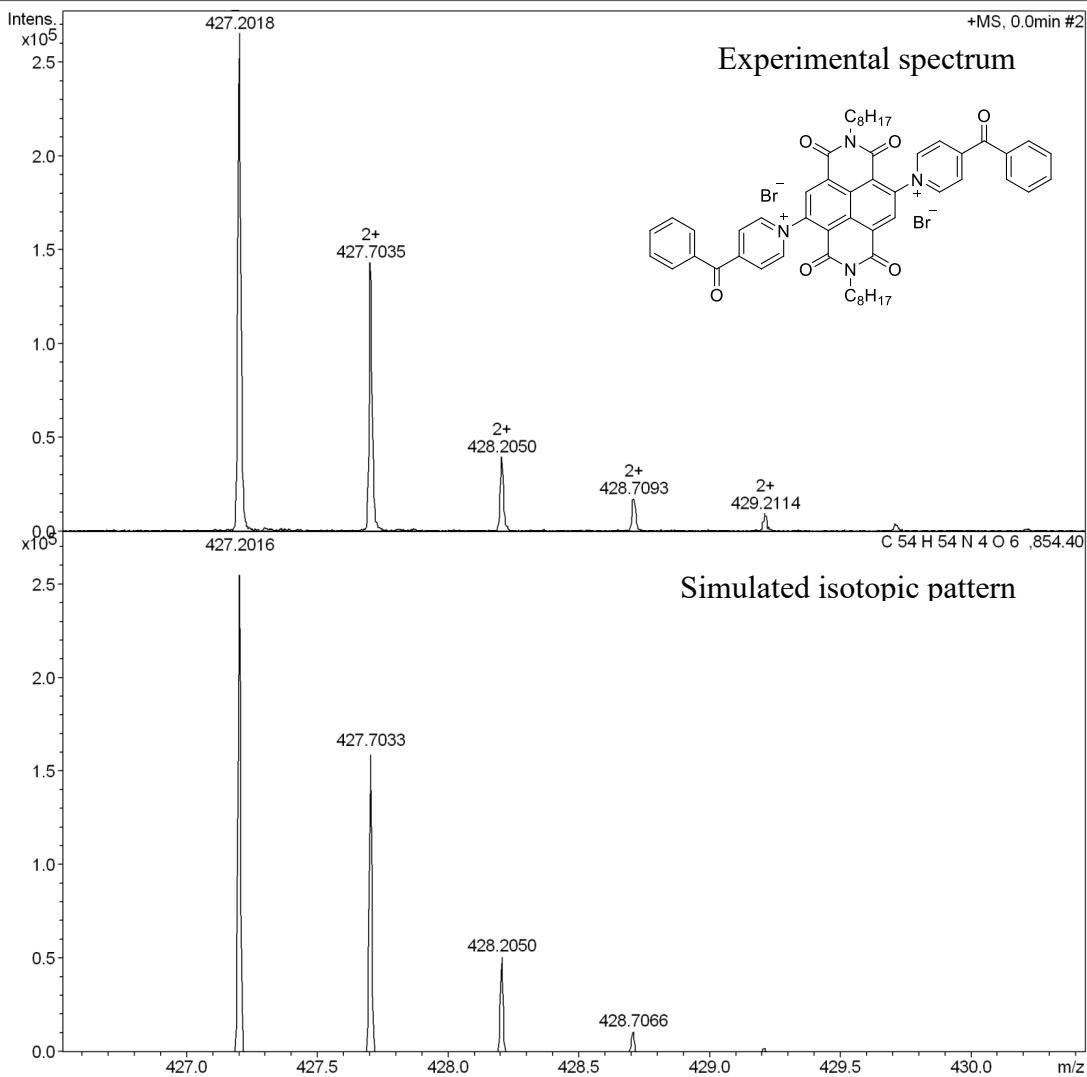

Figure S24. HRMS spectrum of (A1<sup>2+</sup>)Br<sub>2</sub>.



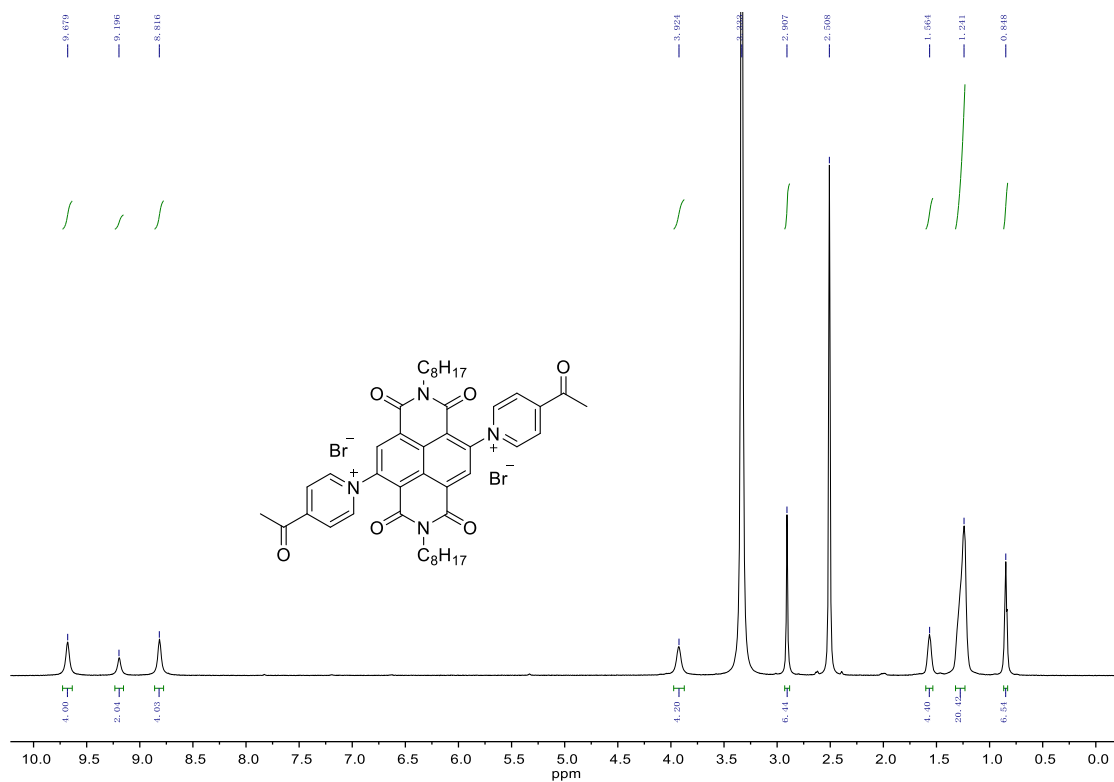

Figure S25.  $^1\text{H}$  NMR spectrum of  $(\text{B1}^{2+})\text{Br}_2$  in  $d_6$ -DMSO.

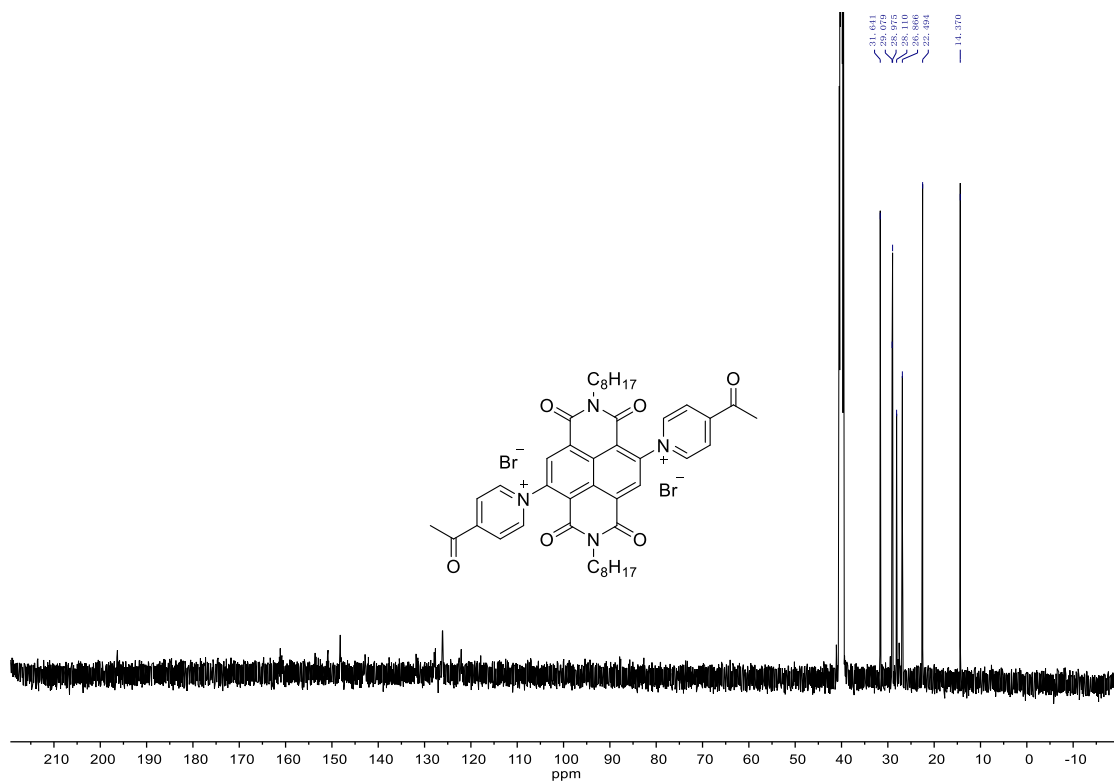

Figure S26.  $^{13}\text{C}$  NMR spectrum of  $(\text{B1}^{2+})\text{Br}_2$  in  $d_6$ -DMSO.

## Display Report

### Analysis Info

Analysis Name D:\Data\2022\0808\LQT-2.d  
Method pos\_low-20151116.m  
Sample Name linqiting  
Comment

Acquisition Date 2022-08-08 10:43:48

Operator Fan  
Instrument maXis 10103

### Acquisition Parameter

|             |            |                       |           |                  |           |
|-------------|------------|-----------------------|-----------|------------------|-----------|
| Source Type | ESI        | Ion Polarity          | Positive  | Set Nebulizer    | 0.4 Bar   |
| Focus       | Not active | Set Capillary         | 4000 V    | Set Dry Heater   | 180 °C    |
| Scan Begin  | 100 m/z    | Set End Plate Offset  | -500 V    | Set Dry Gas      | 4.0 l/min |
| Scan End    | 1000 m/z   | Set Collision Cell RF | 200.0 Vpp | Set Divert Valve | Waste     |

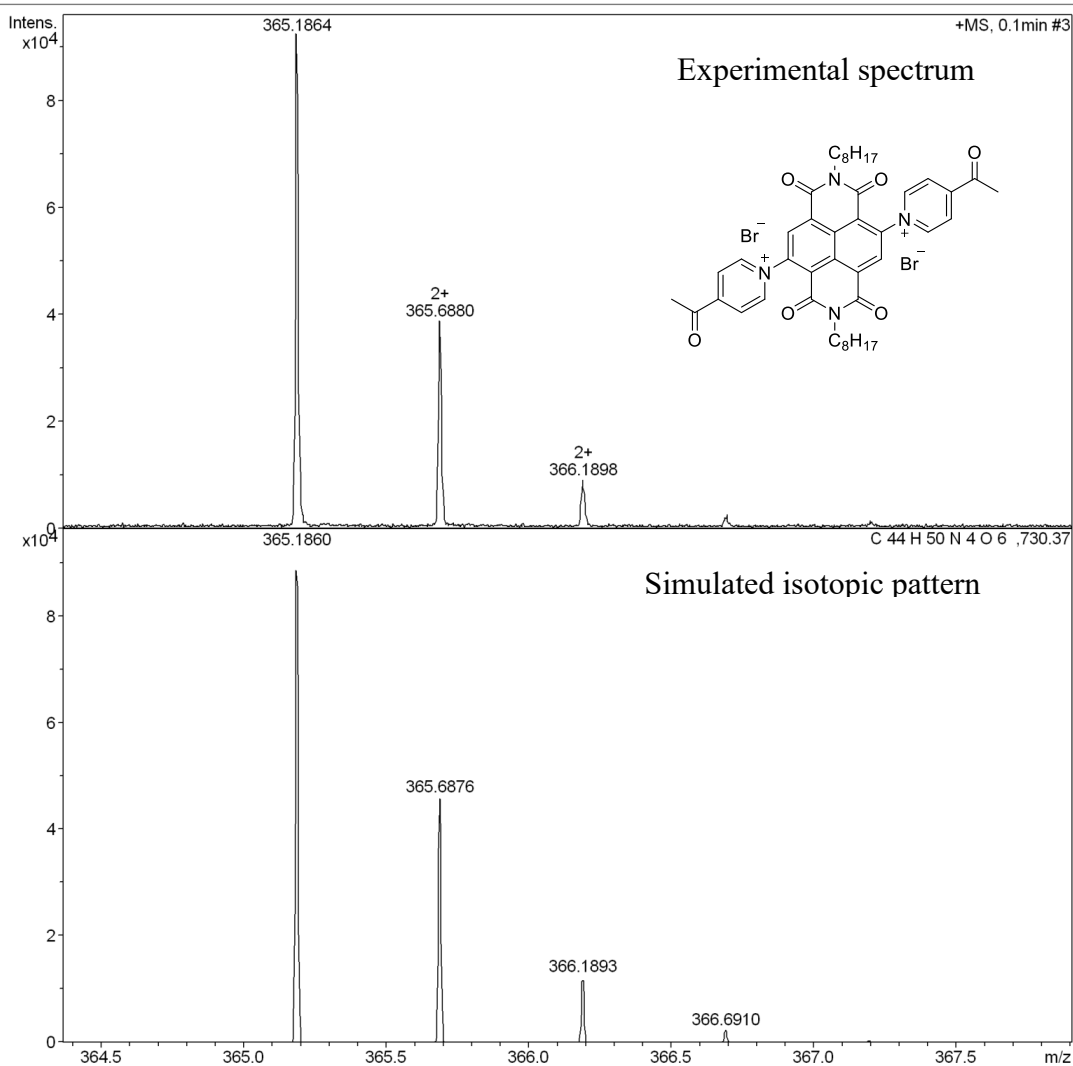

Figure S27. HRMS spectrum of (B1<sup>2+</sup>)Br<sub>2</sub>.

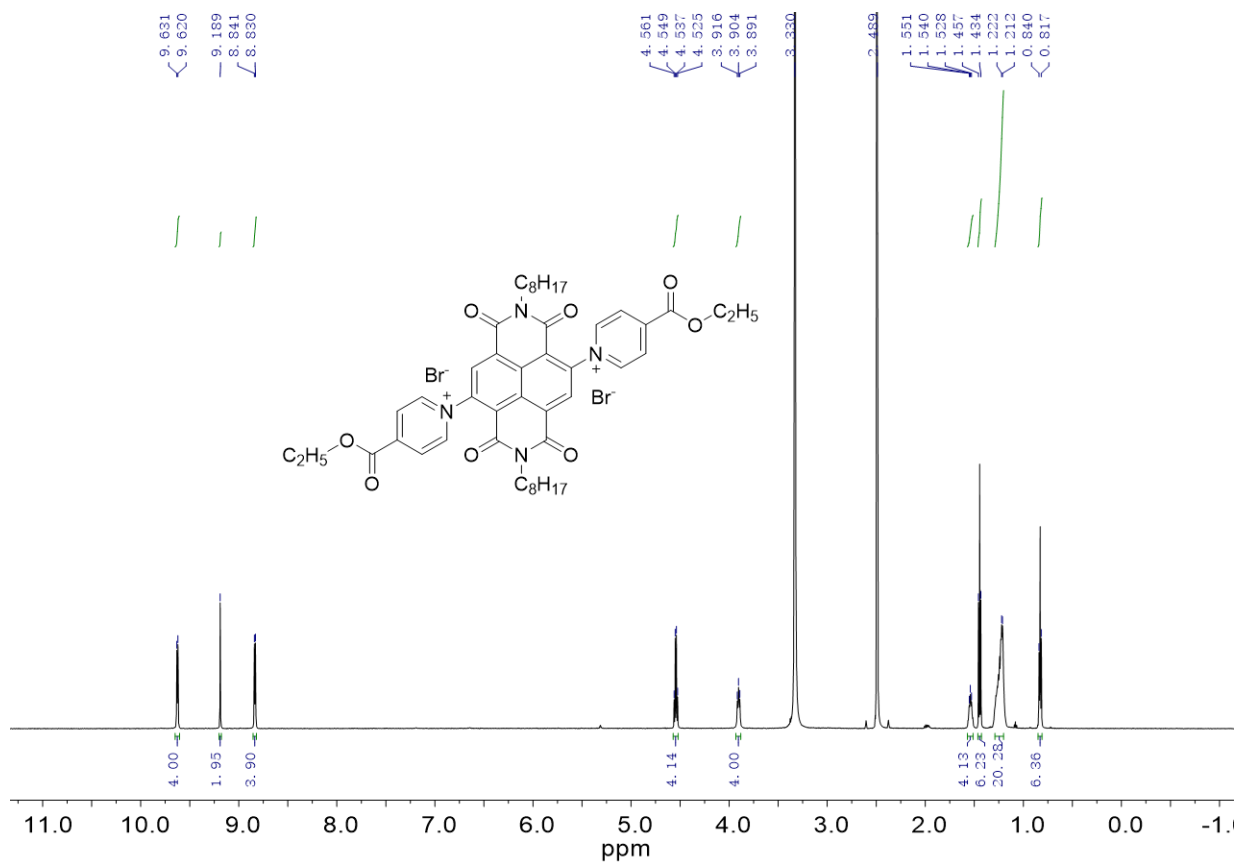

**Figure S28.**  $^1\text{H}$  NMR spectrum of  $(\text{C1}^{2+})\text{Br}_2$  in  $\text{d}_6$ -DMSO.

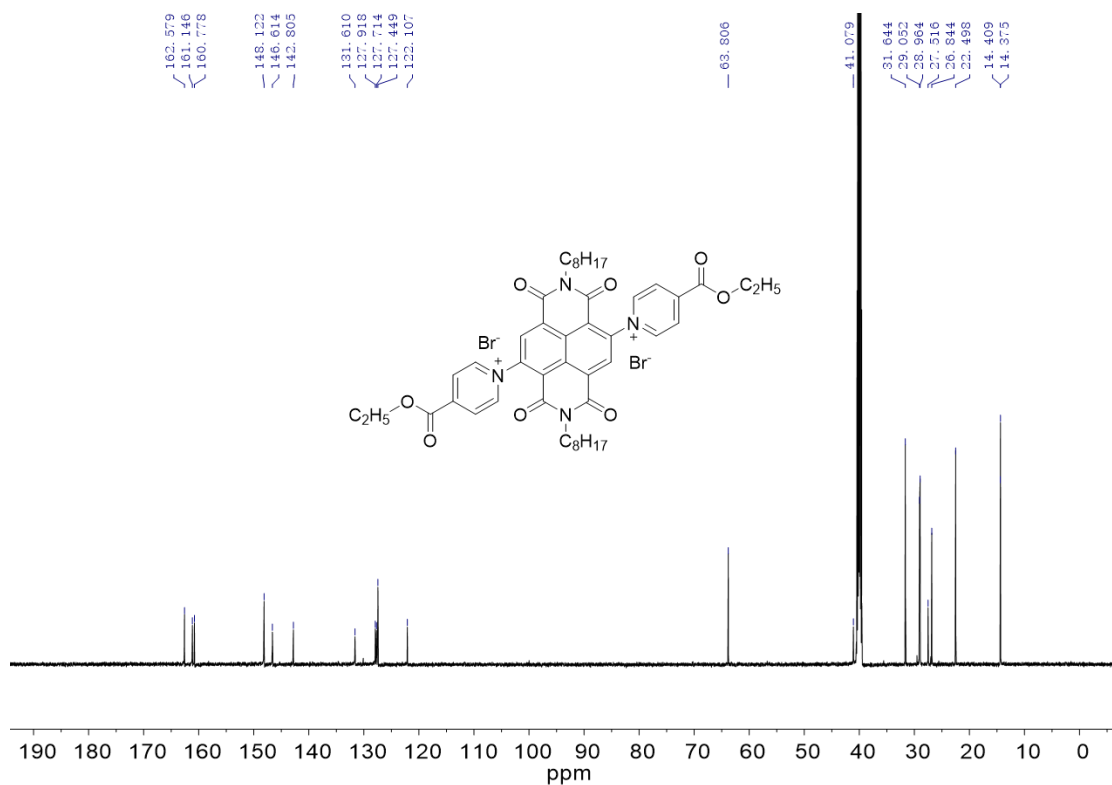

**Figure S29.**  $^{13}\text{C}$  NMR spectrum of  $(\text{C1}^{2+})\text{Br}_2$  in  $\text{d}_6$ -DMSO.

# Display Report

## Analysis Info

Analysis Name D:\Data\2022\0808\LQT-3.d  
Method pos\_low-20151116.m  
Sample Name linqiting  
Comment

Acquisition Date 2022-08-08 10:46:28

Operator Fan  
Instrument maXis 10103

## Acquisition Parameter

|             |            |                       |           |                  |           |
|-------------|------------|-----------------------|-----------|------------------|-----------|
| Source Type | ESI        | Ion Polarity          | Positive  | Set Nebulizer    | 0.4 Bar   |
| Focus       | Not active | Set Capillary         | 4000 V    | Set Dry Heater   | 180 °C    |
| Scan Begin  | 100 m/z    | Set End Plate Offset  | -500 V    | Set Dry Gas      | 4.0 l/min |
| Scan End    | 1000 m/z   | Set Collision Cell RF | 200.0 Vpp | Set Divert Valve | Waste     |

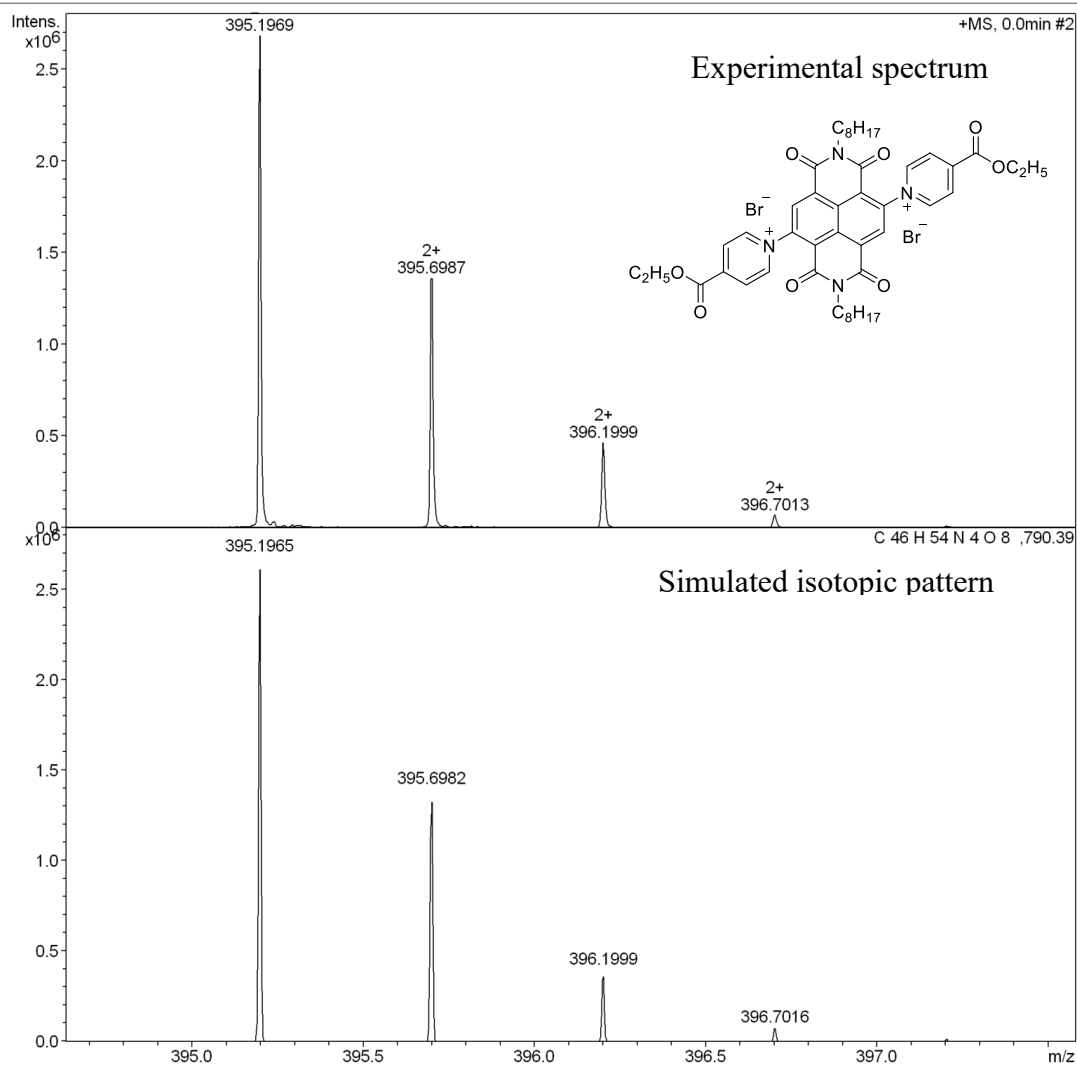

Figure S30. HRMS spectrum of (C<sub>12</sub><sup>+</sup>)Br<sub>2</sub>.

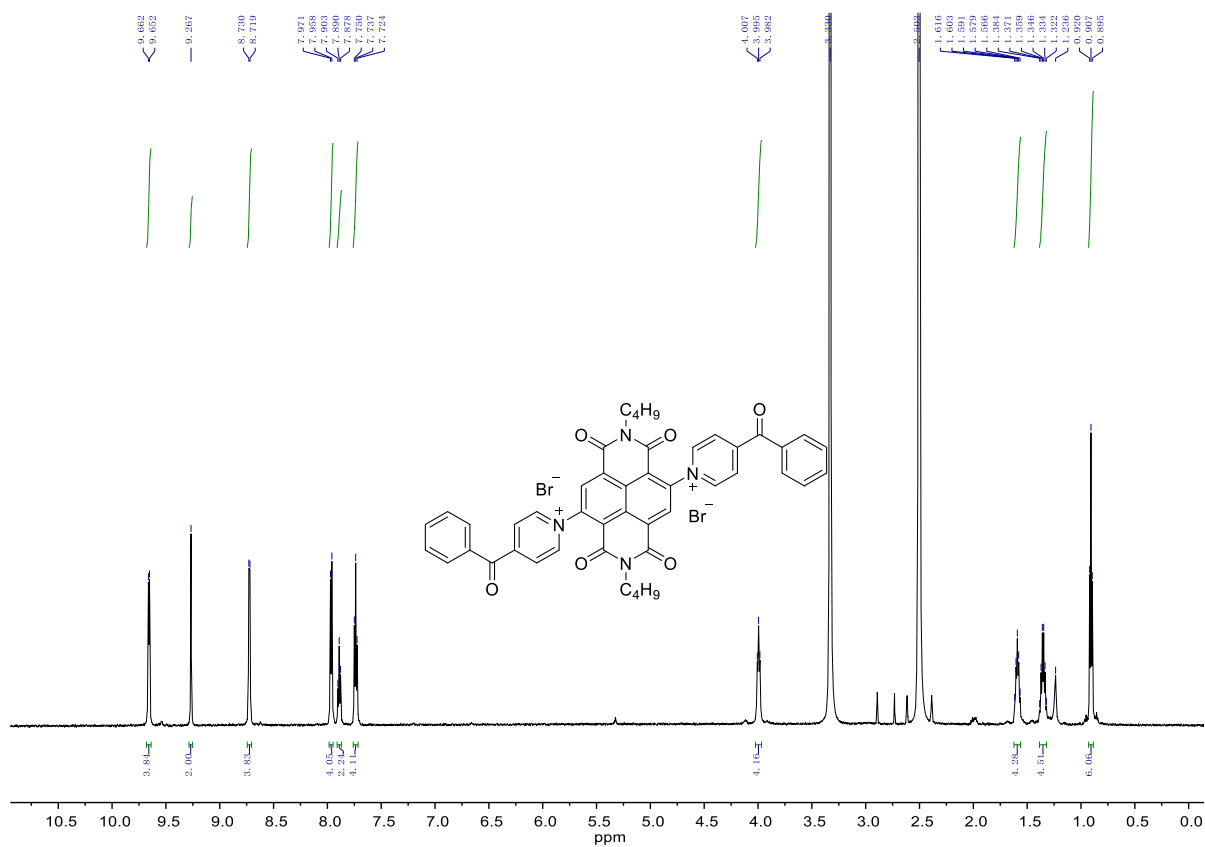

Figure S31.  $^1H$  NMR spectrum of  $(A2^{2+})Br_2$  in  $d_6$ -DMSO.

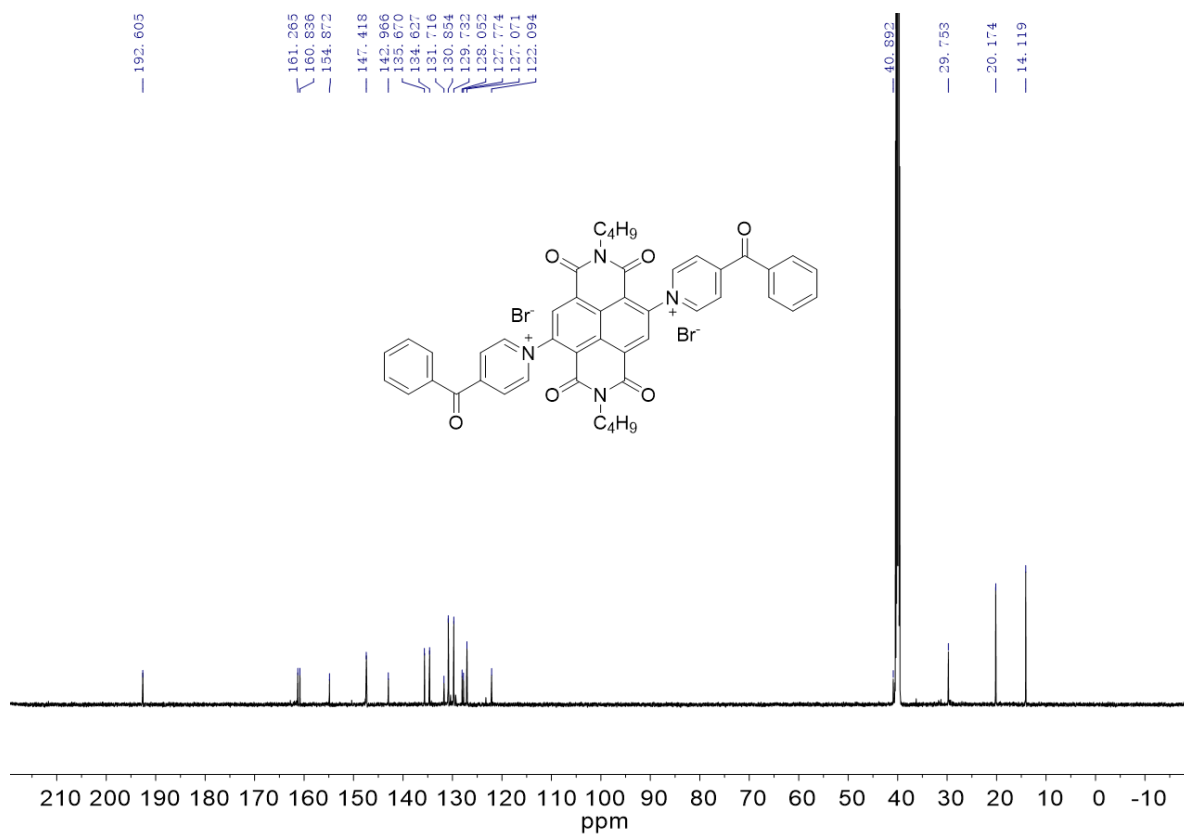

Figure S32.  $^{13}C$  NMR spectrum of  $(A2^{2+})Br_2$  in  $d_6$ -DMSO.

# Display Report

## Analysis Info

Analysis Name D:\Data\2022\1018\lqt-1-1.d  
Method pos\_low-20151116.m  
Sample Name linqiting  
Comment

Acquisition Date 2022-10-18 10:03:46

Operator Fan  
Instrument maXis 10103

## Acquisition Parameter

|             |            |                       |           |                  |           |
|-------------|------------|-----------------------|-----------|------------------|-----------|
| Source Type | ESI        | Ion Polarity          | Positive  | Set Nebulizer    | 0.4 Bar   |
| Focus       | Not active | Set Capillary         | 4000 V    | Set Dry Heater   | 180 °C    |
| Scan Begin  | 100 m/z    | Set End Plate Offset  | -500 V    | Set Dry Gas      | 4.0 l/min |
| Scan End    | 1000 m/z   | Set Collision Cell RF | 200.0 Vpp | Set Divert Valve | Waste     |

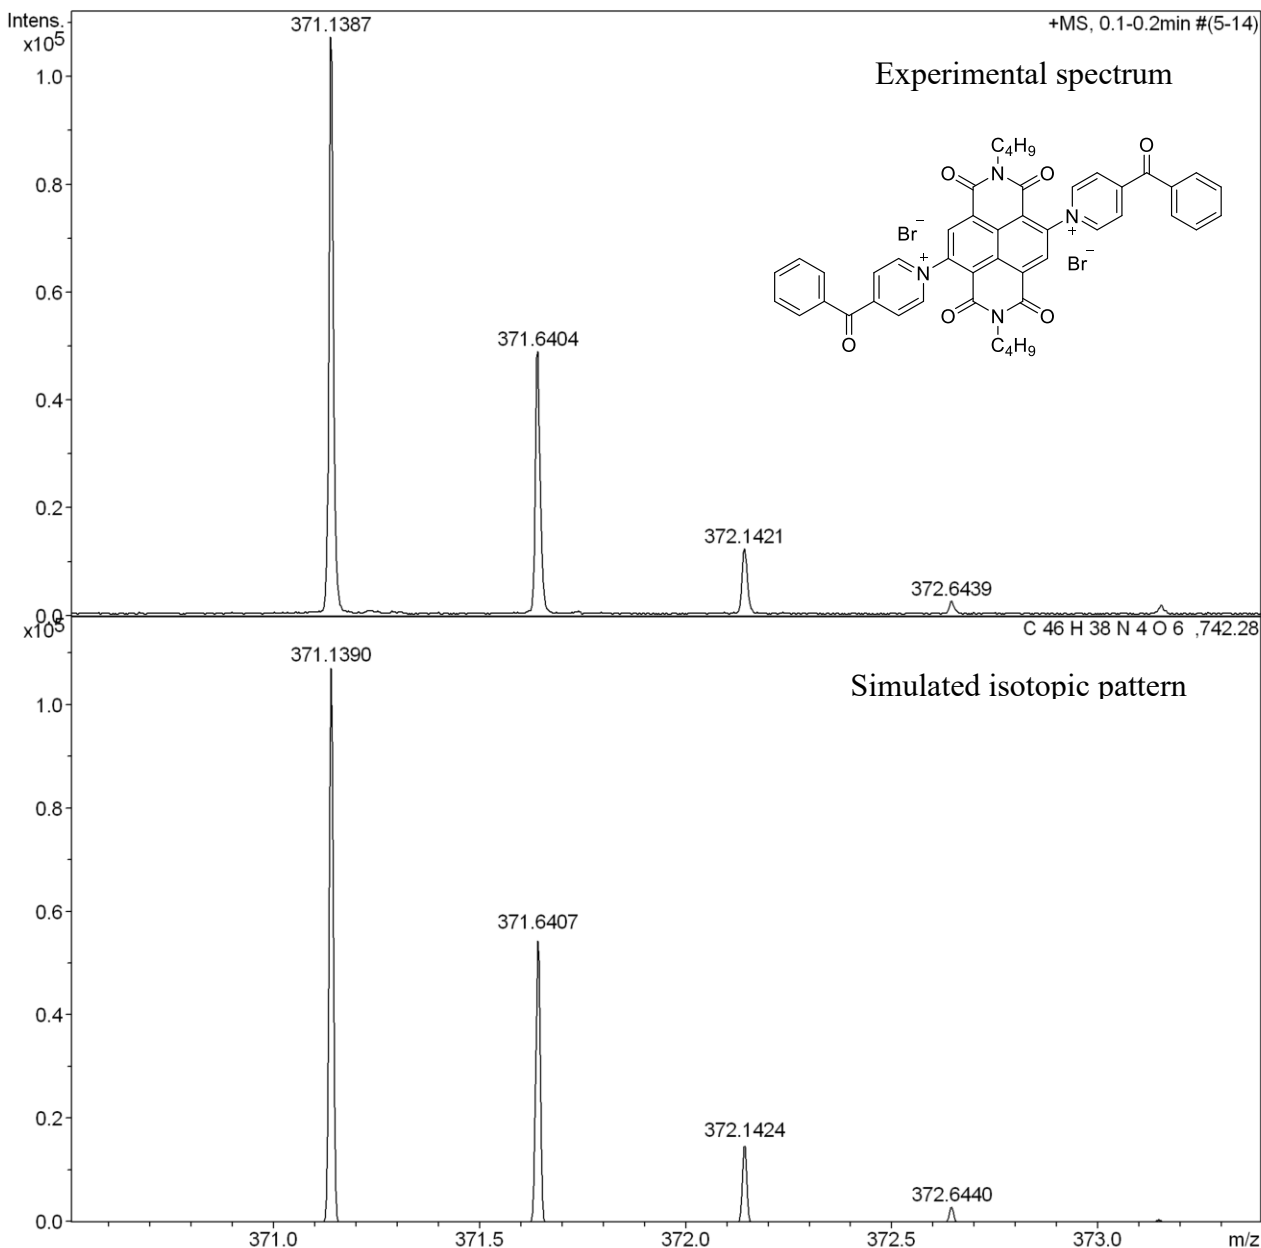

Figure S33. HRMS spectrum of (A<sup>2+</sup>)Br<sub>2</sub>.

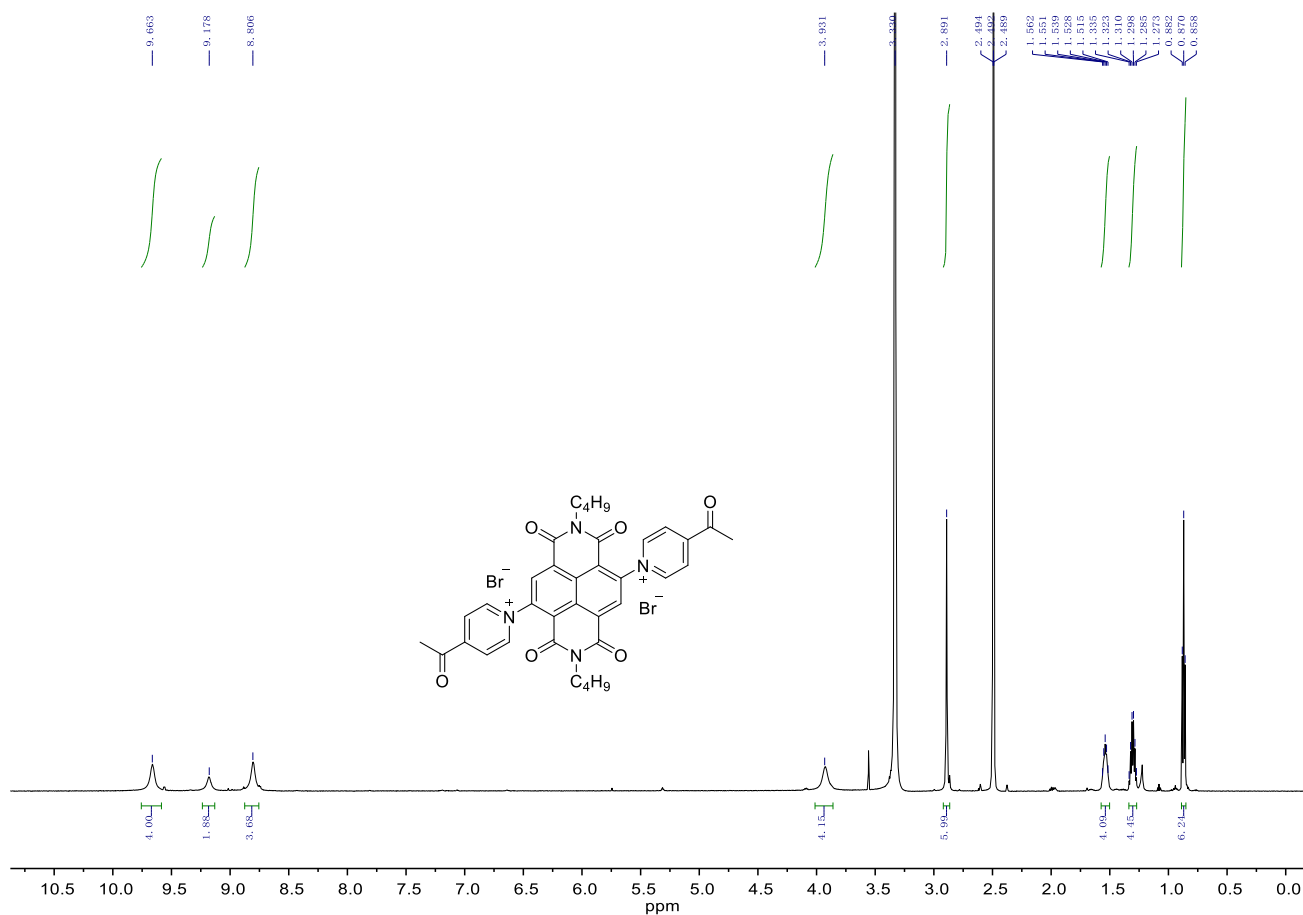

Figure S34.  $^1H$  NMR spectrum of  $(B2^{2+})Br_2$  in  $d_6$ -DMSO.

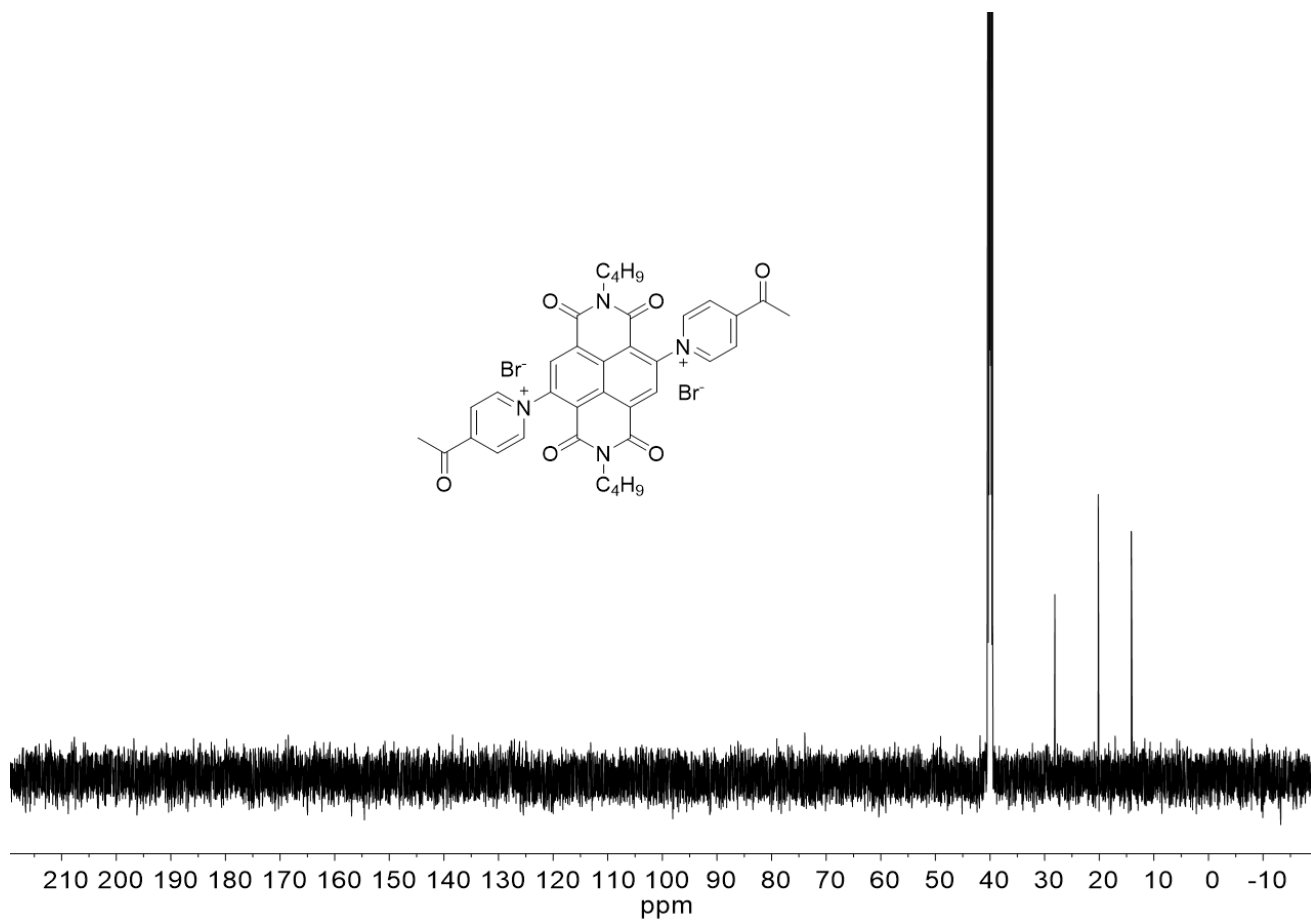

**Figure S35.**  $^{13}\text{C}$  NMR spectrum of  $(\mathbf{B2}^{2+})\text{Br}_2$  in  $d_6$ -DMSO.



# Display Report

## Analysis Info

Analysis Name D:\Data\2022\1018\lqt-2.d  
Method pos\_low-20151116.m  
Sample Name linqiting  
Comment

Acquisition Date 2022-10-18 10:07:15

Operator Fan  
Instrument maXis 10103

## Acquisition Parameter

|             |            |                       |           |                  |           |
|-------------|------------|-----------------------|-----------|------------------|-----------|
| Source Type | ESI        | Ion Polarity          | Positive  | Set Nebulizer    | 0.4 Bar   |
| Focus       | Not active | Set Capillary         | 4000 V    | Set Dry Heater   | 180 °C    |
| Scan Begin  | 100 m/z    | Set End Plate Offset  | -500 V    | Set Dry Gas      | 4.0 l/min |
| Scan End    | 1000 m/z   | Set Collision Cell RF | 200.0 Vpp | Set Divert Valve | Waste     |

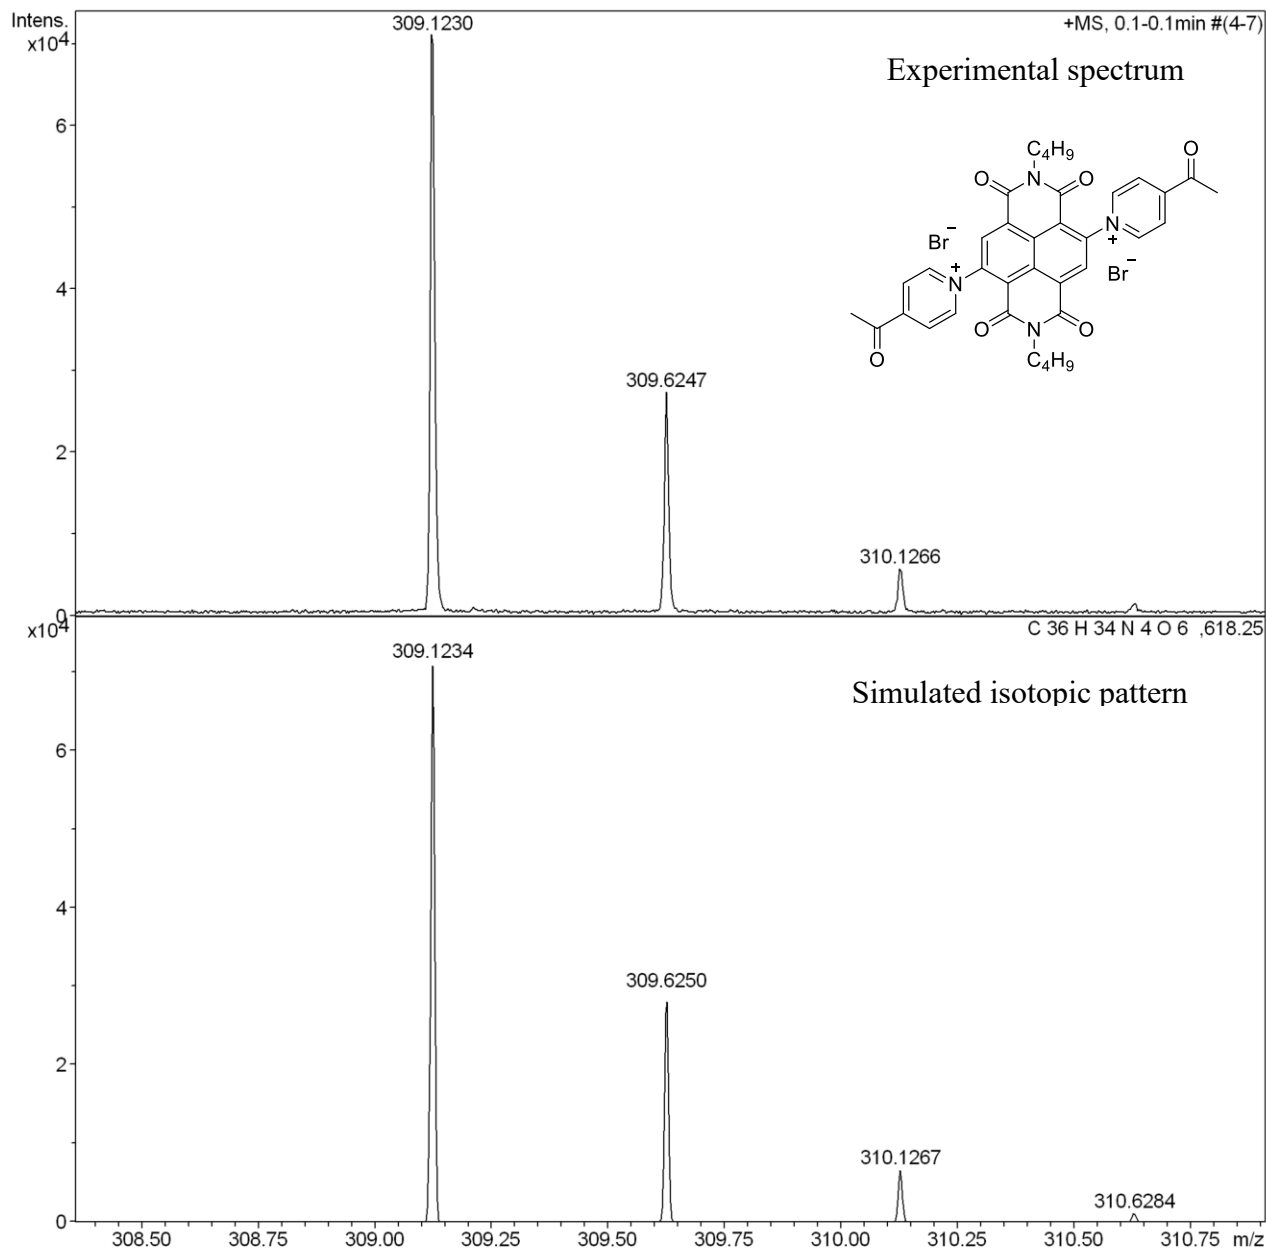

Figure S36. HRMS spectrum of (B<sup>2+</sup>)Br<sub>2</sub>.

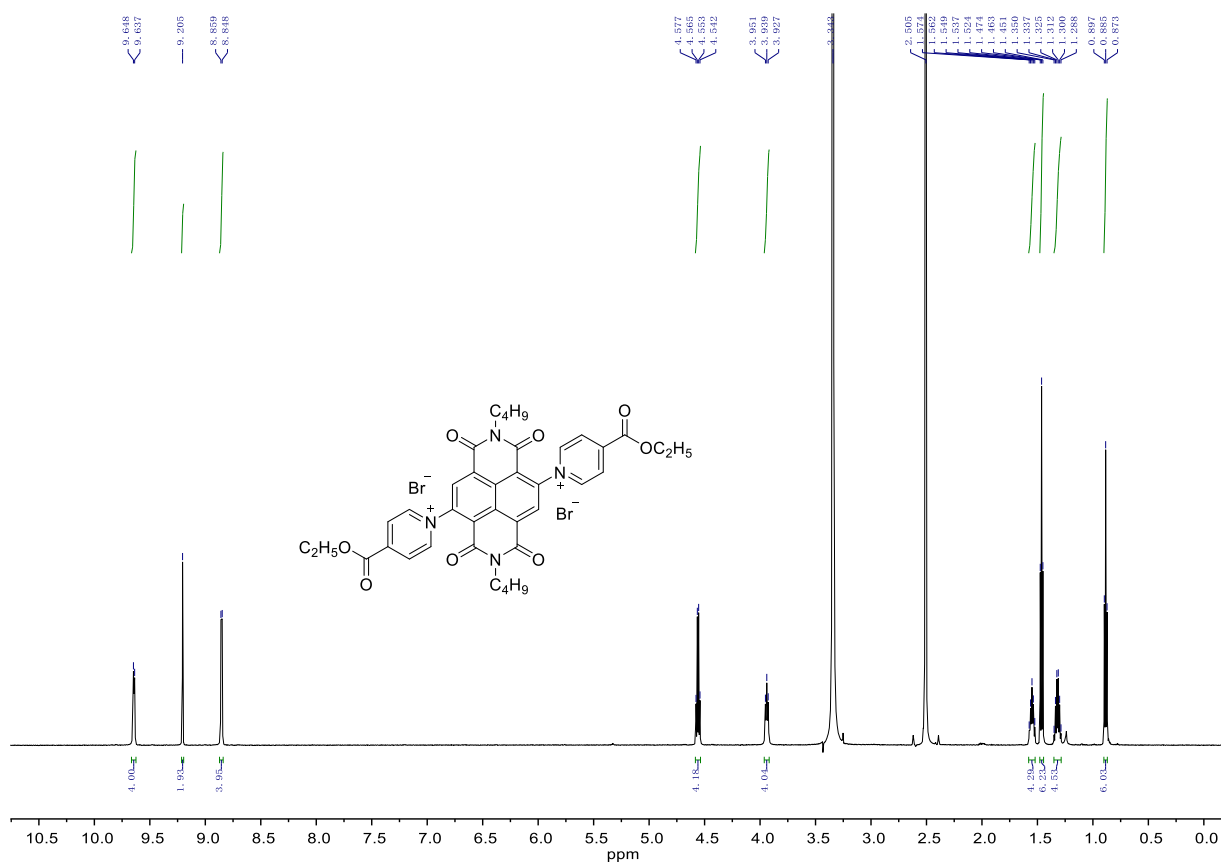

Figure S37. <sup>1</sup>H NMR spectrum of (C2<sup>2+</sup>)Br<sub>2</sub> in d<sub>6</sub>-DMSO.

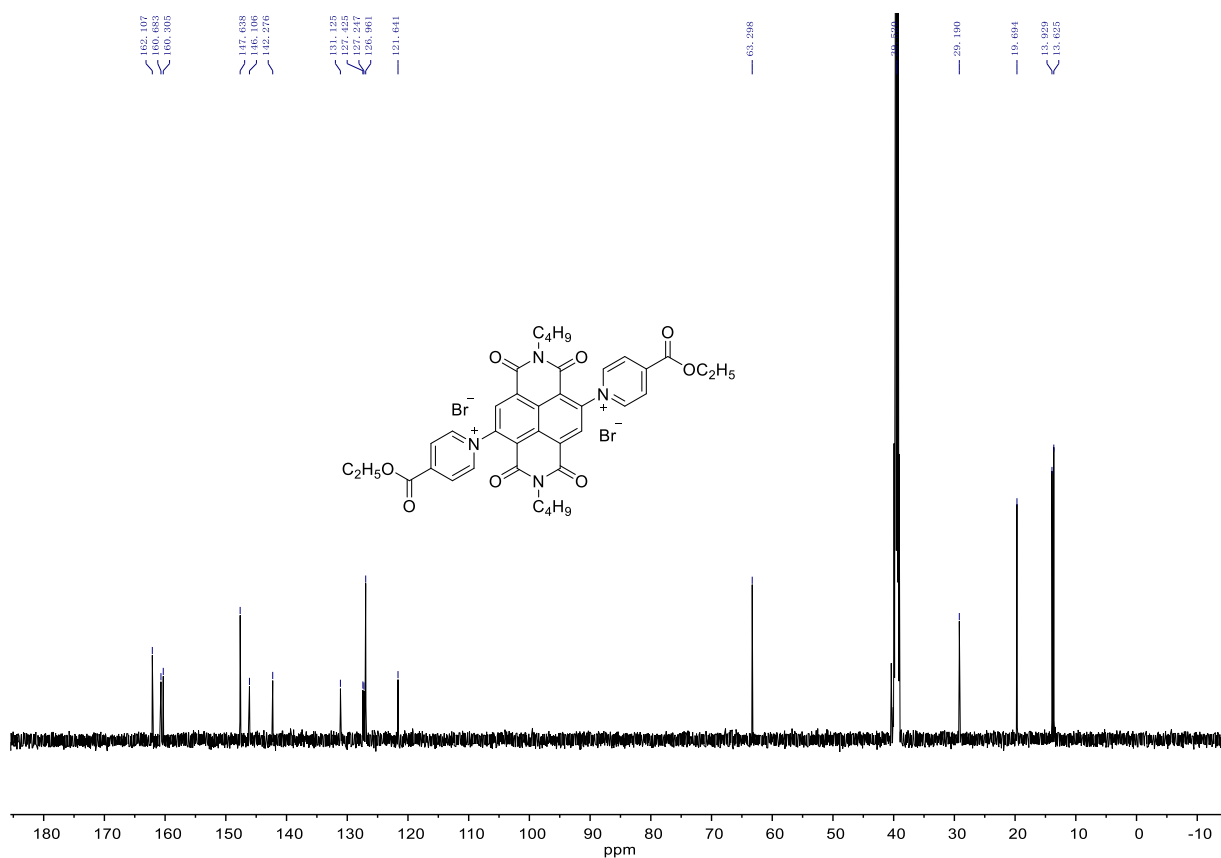

Figure S38. <sup>13</sup>C NMR spectrum of (C2<sup>2+</sup>)Br<sub>2</sub> in d<sub>6</sub>-DMSO.

# Display Report

## Analysis Info

Analysis Name D:\Data\2022\1018\lqt-3.d  
Method pos\_low-20151116.m  
Sample Name linqiting  
Comment

Acquisition Date 2022-10-18 10:10:04  
Operator Fan  
Instrument maXis 10103

## Acquisition Parameter

|             |            |                       |           |                  |           |
|-------------|------------|-----------------------|-----------|------------------|-----------|
| Source Type | ESI        | Ion Polarity          | Positive  | Set Nebulizer    | 0.4 Bar   |
| Focus       | Not active | Set Capillary         | 4000 V    | Set Dry Heater   | 180 °C    |
| Scan Begin  | 100 m/z    | Set End Plate Offset  | -500 V    | Set Dry Gas      | 4.0 l/min |
| Scan End    | 1000 m/z   | Set Collision Cell RF | 200.0 Vpp | Set Divert Valve | Waste     |

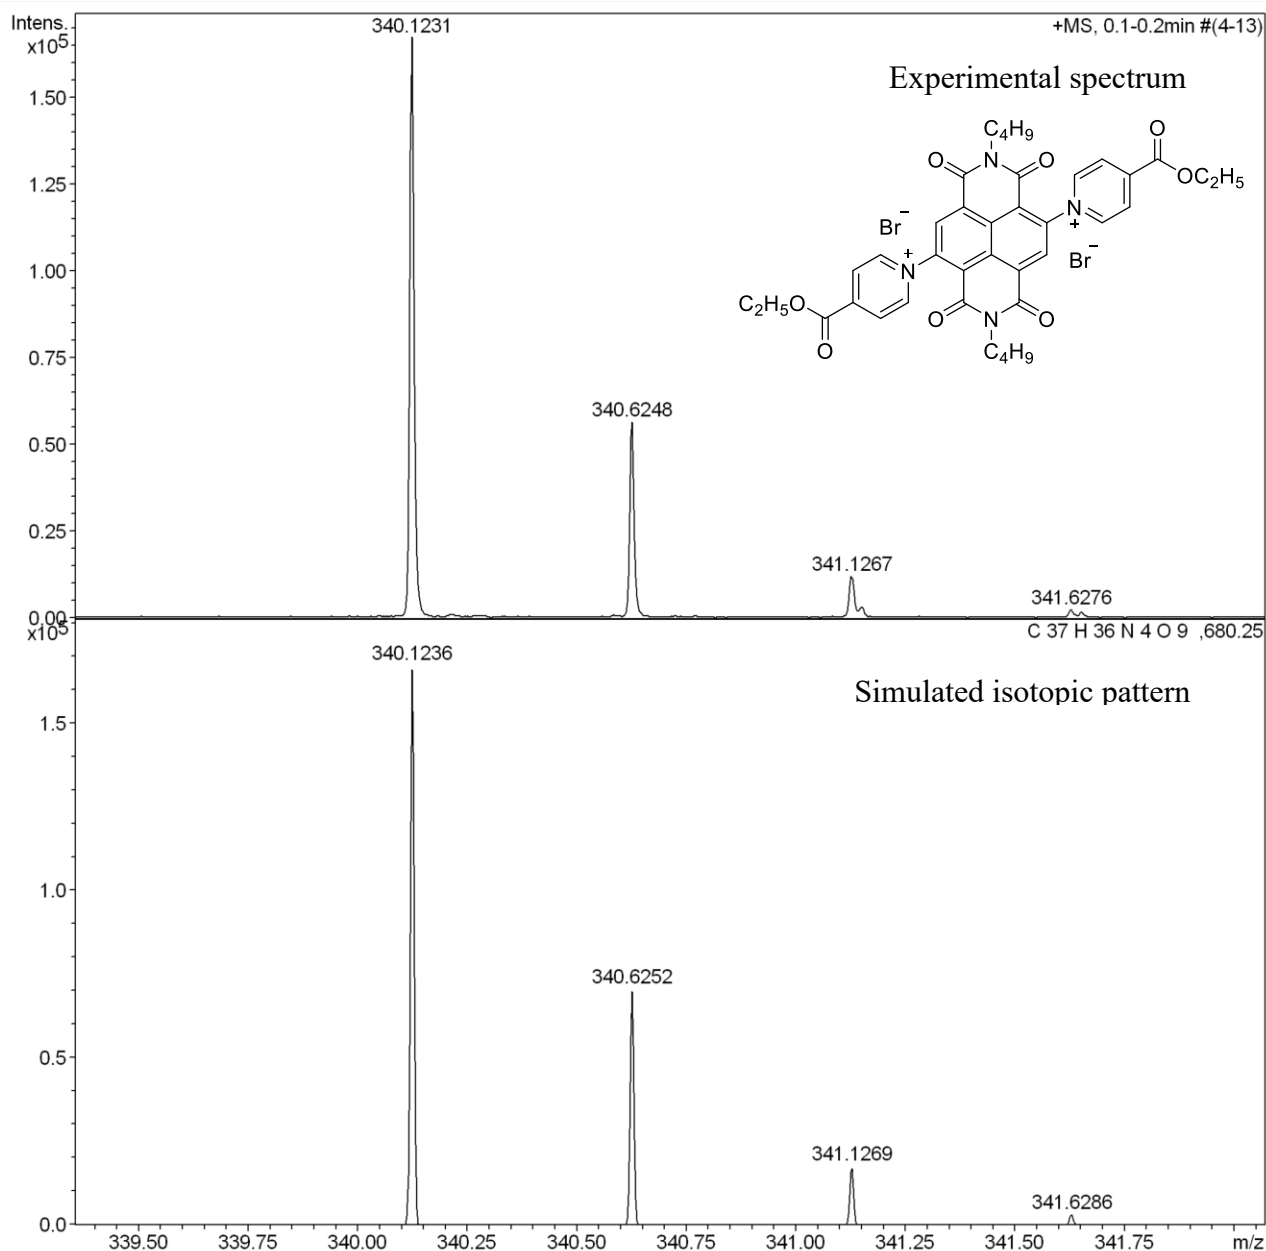

Figure S39. HRMS spectrum of (C<sub>22</sub>)Br<sub>2</sub>.

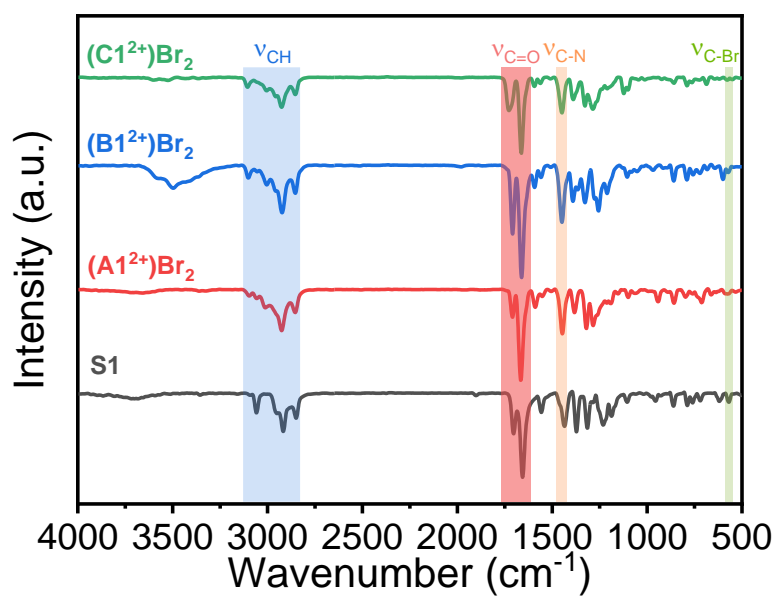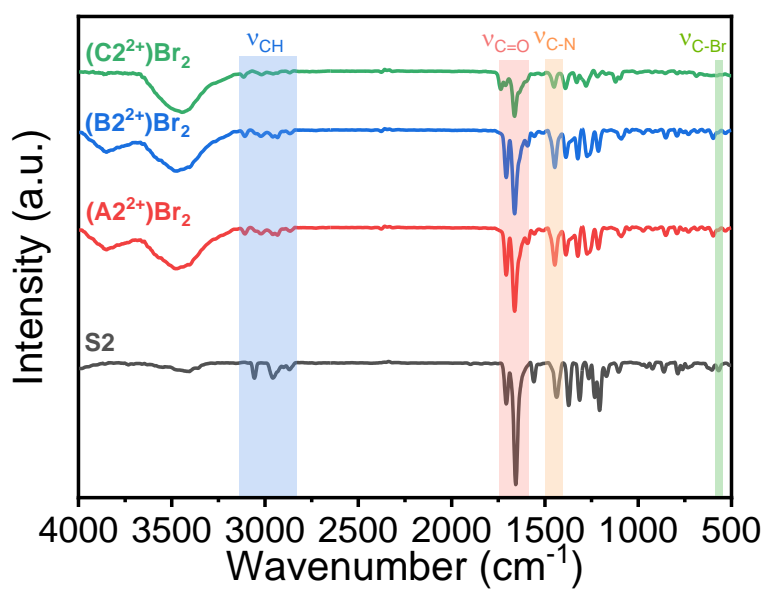

**Figure S40.** IR spectra of six NDI-carbonylpyridinium conjugates compared with their precursors S1 and S2.

**Table S1.** Peak assignments in FTIR spectrum.

| Samples                                | $\nu_{\text{CH}}(\text{cm}^{-1})$ | $\nu_{\text{C=O}}(\text{cm}^{-1})$ | $\nu_{\text{C-N}}(\text{cm}^{-1})$ | $\nu_{\text{C-Br}}(\text{cm}^{-1})$ |
|----------------------------------------|-----------------------------------|------------------------------------|------------------------------------|-------------------------------------|
| <b>S1</b>                              | 3059, 2918, 2849                  | 1703, 1657                         | 1435                               | 569                                 |
| <b>(A1<sup>2+</sup>)Br<sub>2</sub></b> | 3096, 2926, 2855                  | 1709, 1666                         | 1447                               | -                                   |
| <b>(B1<sup>2+</sup>)Br<sub>2</sub></b> | 3101, 2924, 2855                  | 1709, 1661                         | 1448                               | -                                   |
| <b>(C1<sup>2+</sup>)Br<sub>2</sub></b> | 3105, 2926, 2855                  | 1728, 1663                         | 1448                               | -                                   |
| <b>S2</b>                              | 3055, 2949, 2870                  | 1705, 1655                         | 1437                               | 567                                 |
| <b>(A2<sup>2+</sup>)Br<sub>2</sub></b> | 3098, 2966, 2930                  | 1709, 1666                         | 1447                               | -                                   |
| <b>(B2<sup>2+</sup>)Br<sub>2</sub></b> | 3107, 3020, 2934                  | 1707, 1663                         | 1447                               | -                                   |
| <b>(C2<sup>2+</sup>)Br<sub>2</sub></b> | 3115, 3020, 2955                  | 1738, 1663                         | 1452                               | -                                   |

Compared to **S1** and **S2**, the aryl C-Br peaks at 567-569  $\text{cm}^{-1}$  disappeared in NDI-carbonylpyridinium conjugates, manifesting the successful coupling reaction (also see Table S1).

## References

- [S1] (a) Sasikumar, M.; Suseela, Y. V.; Govindaraju, T. *Asian J. Org. Chem.* **2013**, *2*, 779-785. (b) Robitaille, A.; Jenekhe, S. A.; Leclerc, M. *Chem. Mater.* **2018**, *30*, 5353-5361.
- [S2] Lai, W.-C.; Wang, S.-H.; Sun, H.-S.; Liao, C.-W.; Liu, T.-Y.; Lee, H.-T.; Yang, H.-R.; Wang, L.; Lai, Y.-Y. *ACS Appl. Polym. Mater.* **2022**, *4*, 521-526.
- [S3] Lindström, H.; Södergren, S.; Solbrand, A.; Rensmo, H.; Hjelm, J.; Hagfeldt, A.; Lindquist, S.-E. *J. Phys. Chem. B* **1997**, *101*, 7717.
- [S4] Liu, T. C.; Pell, W. G.; Conway, B. E.; Roberson, S. L. *J. Electrochem. Soc.* **1998**, *145*, 1882.
- [S5] (a) Cui, Y.; Zhao, X.; Guo, R. *Electrochim. Acta* **2010**, *55*, 922-926. (b) Wang, S.; Wang, Q.; Shao, P.; Han, Y.; Gao, X.; Ma, L.; Yuan, S.; Ma, X.; Zhou, J.; Feng, X.; Wang, B. *J. Am. Chem. Soc.* **2017**, *139*, 4258-4261.
